# Supplementary material
Source: publisher figshare collection journal article supplement (https://acs.figshare.com/ndownloader/files/21808644)
Supplement: Supplementary file 1 [file 21808644]

## **Molybdenum Disubstituted Alkylidene Complexes**

Jordan W. Taylor, Richard R. Schrock,\* and Charlene Tsay

Department of Chemistry, University of California-Riverside, Riverside, CA 92501

Email: richard.schrock@ucr.edu

### **Contents**

|                                                                                                                                   |         |
|-----------------------------------------------------------------------------------------------------------------------------------|---------|
| General Considerations .....                                                                                                      | S3      |
| Mo(NAr)(CMePh)(OMes) <sub>2</sub> ( <b>1</b> ) .....                                                                              | S3      |
| [Mo(NAr)(CMePh)(OC <sub>6</sub> F <sub>5</sub> ) <sub>2</sub> ] <sub>2</sub> ( <b>2</b> ) .....                                   | S3      |
| Mo(NAr)(CMePh)(OC <sub>6</sub> F <sub>5</sub> ) <sub>2</sub> (THF) <sub>x</sub> ( <b>2</b> (THF) <sub>x</sub> ; x = 1 or 2) ..... | S3      |
| Mo(NAr)(CMePh)(OC <sub>6</sub> F <sub>5</sub> ) <sub>2</sub> (MeCN) ( <b>2</b> (MeCN)) .....                                      | S4      |
| Mo(NAr)(CMePh)(OC <sub>6</sub> F <sub>5</sub> ) <sub>2</sub> (bipy) ( <b>2</b> (bipy)) .....                                      | S4      |
| Mo(NAr)(CMePh)(Cl) <sub>2</sub> (bipy) ( <b>3</b> (bipy)) .....                                                                   | S5      |
| Mo(NAr)(CMePh)(Cl)(OHMT) ( <b>4</b> ) .....                                                                                       | S5      |
| Mo(NAr)(CMePh)(Cl)(OHMT)(MeCN) ( <b>4</b> (MeCN)) .....                                                                           | S5      |
| Mo(NAr)(CMePh)(OHMT)(NC <sub>4</sub> H <sub>4</sub> ) ( <b>5</b> ) .....                                                          | S6      |
| Spectroscopic Data .....                                                                                                          | S6-S21  |
| Reactions of <b>2</b> (THF) <sub>x</sub> with Ethylene .....                                                                      | S22-S25 |
| Reactions of <b>4</b> (MeCN) with Ethylene .....                                                                                  | S26     |
| Catalytic Experiments .....                                                                                                       | S27     |
| Ring-opening polymerization of cyclooctene with <b>2</b> (THF) <sub>x</sub> and <b>4</b> (MeCN) .....                             | S27     |
| Homocoupling with 1-decene with <b>2</b> (THF) <sub>x</sub> and <b>4</b> (MeCN) .....                                             | S28     |
| X-Ray Crystallography .....                                                                                                       | S29-S35 |
| References .....                                                                                                                  | S36     |

**General considerations.** Unless otherwise noted, all manipulations were carried out using standard Schlenk or glovebox techniques under a N<sub>2</sub> atmosphere. THF, Et<sub>2</sub>O, hexanes, benzene, toluene, and acetonitrile were dried and deoxygenated by passage through activated alumina in a solvent purification system from JC Meyer Solvent Systems followed by storage over 4 Å molecular sieves. Non-halogenated and non-nitrile containing solvents were tested with a standard solution of purple sodium benzophenone ketyl in THF to confirm effective oxygen and moisture removal prior to use. Pentafluorophenol (C<sub>6</sub>F<sub>5</sub>OH), 2,4,6-trimethylphenol (MesOH),  $\alpha$ -methylstyrene, 2,2'-bipyridine (bipy) and trimethylchlorosilane (TMSCl) were purchased from commercial suppliers and purified according to literature procedures prior to use. Sodium pyrrolide (NaN<sub>4</sub>C<sub>4</sub>H<sub>4</sub>),<sup>1</sup> lithium-hexamethylterphenoxide (LiOHMT = LiO-2,6-(2,4,6-Me<sub>3</sub>C<sub>6</sub>H<sub>2</sub>)<sub>2</sub>C<sub>6</sub>H<sub>3</sub>),<sup>2</sup> Mo(NAr)(CHCMe<sub>3</sub>)(OR<sub>F6</sub>)<sub>2</sub><sup>3</sup> and Mo(NAr)(CHMe<sub>2</sub>Ph)(OR<sub>F6</sub>)<sub>2</sub><sup>3</sup> (OR<sub>F6</sub> = OC(CH<sub>3</sub>)(CF<sub>3</sub>)<sub>2</sub>) were prepared according to literature procedures. Elemental analyses were performed by Midwest Microlab, LLC, Indianapolis, IN. Deuterated solvents were purchased from Cambridge Isotope Laboratories Inc., degassed, and dried over activated 4 Å molecular sieves for at least 24 h prior to use. NMR spectra were recorded on Bruker Avance 600 MHz and Bruker Avance 300 MHz spectrometers. <sup>1</sup>H and <sup>13</sup>C chemical shifts are reported in ppm relative to tetramethylsilane using residual solvent as an internal standard. <sup>19</sup>F chemical shifts are reported in ppm relative to fluorobenzene as an external standard.

**Mo(NAr)(CMePh)(OMes)<sub>2</sub> (1).**  $\alpha$ -Methylstyrene (0.014 g, 0.12 mmol) was added to a solution of Mo(NAr)(CHCMe<sub>3</sub>)(OR<sub>F6</sub>)<sub>2</sub> (0.042 g, 0.060 mmol) in benzene (5 mL) and the vessel was sealed in a 50 mL Schlenk flask with Teflon stopper. The reaction was subjected to three freeze-pump-thaw cycles prior to being heated to 60 °C for 5 hours. Every 1 hour, the Teflon stopper was opened to vacuum (10<sup>-2</sup> mbar) briefly prior to continuing heating. After 5 h, the volatiles were removed *in vacuo*. The dark red residue was extracted with pentane (3 x 1 mL) and extract was filtered through Celite. Volatiles were again removed *in vacuo* prior to dissolving the residue in benzene (2 mL) and adding 2,4,6-trimethylphenol (0.016 g, 0.12 mmol) as a benzene (0.5 mL) solution. The reaction was stirred 1 h prior to removing volatiles *in vacuo*. The red residue was dissolved in minimal pentane (~0.3 mL) and the solution was left at -30 °C overnight during which time red plates grew. The crystals were rinsed with chilled pentane (-30 °C, 0.3 mL) and dried *in vacuo*: yield 0.029 g (74 %). A single crystal suitable for XRD was obtained by cooling a saturated pentane solution to -30 °C: <sup>1</sup>H NMR (600 MHz, C<sub>6</sub>D<sub>6</sub>)  $\delta$  7.3-7.4 (m, 3H), 7.0 – 6.9 (m, 5H), 6.8 (s, 4H), 3.5 (dq, *J* = 13.7, 6.8 Hz, 2H), 3.0 (s, 3H), 2.3 (s, 12H), 2.2 (s, 6H), 1.0 (d, *J* = 6.8 Hz, 12H); <sup>13</sup>C{<sup>1</sup>H} NMR (151 MHz, C<sub>6</sub>D<sub>6</sub>)  $\delta$  263.1, 159.7, 153.6, 147.3, 146.0, 130.3, 129.3, 128.6, 128.4, 127.6, 126.4, 126.2, 123.4, 29.1, 23.5, 20.8, 17.4, 16.9. Anal. Calcd. for C<sub>38</sub>H<sub>47</sub>MoNO<sub>2</sub> (+ 1 C<sub>7</sub>H<sub>8</sub>): C, 73.25; H, 7.51; N, 1.90. Found: C, 73.58; H, 7.77; N, 1.98.

**[Mo(NAr)(CMePh)(OC<sub>6</sub>F<sub>5</sub>)<sub>2</sub>]<sub>2</sub> (2).**  $\alpha$ -Methylstyrene (0.466 g, 3.95 mmol) was added to a solution of Mo(NAr)(CHMe<sub>2</sub>Ph)(OR<sub>F6</sub>)<sub>2</sub> (0.604 g, 0.789 mmol) in Et<sub>2</sub>O (7 mL). The solution was stirred for 5 minutes and a solution of pentafluorophenol (0.312 g, 1.66 mmol) in Et<sub>2</sub>O (2 mL) was added dropwise. After 4 hours, the yellow precipitate was filtered off, washed with Et<sub>2</sub>O (4 x 1 mL), and dried *in vacuo*: yield 0.572 g (95 %). [Mo(NAr)(CMePh)(OC<sub>6</sub>F<sub>5</sub>)<sub>2</sub>]<sub>2</sub> is not soluble enough in CD<sub>2</sub>Cl<sub>2</sub> or CDCl<sub>3</sub> to acquire NMR data readily. Anal. Calcd. for C<sub>32</sub>H<sub>25</sub>F<sub>10</sub>MoNO<sub>2</sub>: C, 51.84; H, 3.40; N, 1.89. Found: C, 51.81; H, 3.75; N, 1.62.

**Mo(NAr)(CMePh)(OC<sub>6</sub>F<sub>5</sub>)<sub>2</sub>(THF)<sub>x</sub> (2(THF)<sub>x</sub>; x = 1 or 2).** [Mo(NAr)(CMePh)(OC<sub>6</sub>F<sub>5</sub>)<sub>2</sub>]<sub>2</sub> (0.007 g, 0.0094 mmol) was dissolved in THF-*d*<sub>8</sub> (0.6 mL) to give an orange solution: <sup>1</sup>H NMR

(600 MHz, THF-*d*<sub>8</sub>, -40 °C)  $\delta$  7.4 (d, *J* = 7.7 Hz, 2H), 7.3 (t, *J* = 7.7 Hz, 2H), 7.2 (s, 3H), 7.1 (t, *J* = 7.3 Hz, 1H), 3.8 (hept, *J* = 6.1, 5.6 Hz, 2H), 3.7 (s, 2H), 3.6 (s, 3H), 1.7 (s, 2H), 1.1 (dd, *J* = 10.1, 7.0 Hz, 12H);  $^{19}\text{F}\{^1\text{H}\}$  NMR (564 MHz, THF-*d*<sub>8</sub>, -40 °C) Major Isomer:  $\delta$  -157.5 (d, *J* = 21.7 Hz), -158.3 (d, *J* = 21.9 Hz), -164.8 (t, *J* = 21.7 Hz), -165.1 (t, *J* = 21.7 Hz), -172.2 (d, *J* = 22.9 Hz), -172.3 (dd, *J* = 45.6, 23.5 Hz);  $^{19}\text{F}\{^1\text{H}\}$  NMR (564 MHz, THF-*d*<sub>8</sub>, 22 °C)  $\delta$  -156.2, -157.1, -163.7, -163.9, -170.8, -171.1;  $^{13}\text{C}\{^1\text{H}\}$  NMR (151 MHz, THF-*d*<sub>8</sub>, -40 °C)  $\delta$  310.7, 152.3, 148.2, 144.5, 142.6, 142.0, 141.7 (t, *J* = 13.0 Hz), 141.0, 140.5, 139.8, 139.4, 138.1, 137.8, 134.6 (d, *J* = 14.6 Hz), 133.0, 130.3, 128.9, 127.1, 124.5, 68.1, 29.0, 25.9 (M=CMePh), 24.9, 24.7, 24.4, 22.5.

**Mo(NAr)(CMePh)(OC<sub>6</sub>F<sub>5</sub>)<sub>2</sub>(MeCN) (2(MeCN)).** Solid [Mo(NAr)(CMePh)(OC<sub>6</sub>F<sub>5</sub>)<sub>2</sub>]<sub>2</sub> (0.007 g, 0.0094 mmol) was dissolved in CD<sub>3</sub>CN (0.6 mL) in order to give an orange solution. Single crystals of 2(MeCN) suitable for XRD were obtained through addition of MeCN (0.5 mL) to solid 2 (0.020 g) to produce an orange solution that was filtered through Celite and chilled at -30 °C for 12 h:  $^1\text{H}$  NMR (600 MHz, CD<sub>3</sub>CN) Major Isomer:  $\delta$  7.4 – 7.3 (m, 3H), 7.2 (dd, *J* = 8.9, 6.7 Hz, 2H), 7.2 (s, 2H), 7.1 (d, *J* = 1.6 Hz, 1H), 3.7 (s, 3H), 3.7 (hept, *J* = 6.7 Hz, 2H), 1.0 (d, *J* = 4.5 Hz, 6H), 1.0 (d, *J* = 4.6 Hz, 6H), 1.0 (s, 3H);  $^{19}\text{F}\{^1\text{H}\}$  NMR (564 MHz, CD<sub>3</sub>CN)  $\delta$  -163.5 (d, *J* = 19.5 Hz), -164.2 (d, *J* = 19.5 Hz), -169.2 (t, *J* = 20.4 Hz), -169.8 (t, *J* = 20.7 Hz), -177.0 (t, *J* = 21.3 Hz), -177.7 (t, *J* = 21.3 Hz);  $^{13}\text{C}\{^1\text{H}\}$  NMR (151 MHz, CD<sub>3</sub>CN)  $\delta$  Selected resonances of major Isomer:  $\delta$  316.8, 151.8, 149.9, 148.3, 142.3 (m), 140.7 (m), 139.7 (m), 138.0 (m), 130.1, 129.3, 128.9, 126.8, 124.2, 29.1, 28.7, 28.5, 25.3, 24.8, 24.4, 24.4, 23.6. Selected resonances of the minor isomer 1:  $^1\text{H}$  NMR (600 MHz, CD<sub>3</sub>CN)  $\delta$  4.05 (hept, *J* = 6.5 Hz, 2H), 3.98 (s, 3H), 0.99 (s, 3H);  $^{13}\text{C}\{^1\text{H}\}$  NMR (151 MHz, CD<sub>3</sub>CN)  $\delta$  354.9, 37.4. Selected resonances of the minor isomer 2:  $^1\text{H}$  NMR (600 MHz, CD<sub>3</sub>CN)  $\delta$  3.57 (hept, *J* = 6.5 Hz, 2H), 3.45 (s, 3H), 0.98 (s, 3H);  $^{13}\text{C}\{^1\text{H}\}$  NMR (151 MHz, CD<sub>3</sub>CN)  $\delta$  294.9, 19.5.

*Note: Orange crystals of 2(MeCN) readily lose MeCN under vacuum (10<sup>-2</sup> mbar, 10 minutes) and collapse to a yellow powder. For this reason, consistent elemental analyses for 2(MeCN) could not be obtained.*

**Mo(NAr)(CMePh)(OC<sub>6</sub>F<sub>5</sub>)<sub>2</sub>(bipy) (2(bipy)).** A solution of 2,2'-Bipyridine (0.004 g, 0.027 mmol) in THF (1 mL) was added dropwise to a solution of [Mo(NAr)(CMePh)(OC<sub>6</sub>F<sub>5</sub>)<sub>2</sub>]<sub>2</sub> (0.020 g, 0.026 mmol) in THF (1 mL). The reaction was stirred for 30 minutes prior to removing volatiles *in vacuo*. The orange residue was dissolved in minimal Et<sub>2</sub>O (0.5 mL). Pentane (1 mL) was added and the solution filtered rapidly through Celite. The filtrate was cooled to -30 °C for 12 h during which time orange crystals formed. The product was filtered off, washed with pentane (1 mL), and dried *in vacuo*: yield 0.022 g (98 %). A crystal suitable for XRD was obtained by vapor diffusion of Et<sub>2</sub>O into a concentrated dichloromethane solution:  $^1\text{H}$  NMR (600 MHz, C<sub>6</sub>D<sub>6</sub>)  $\delta$  9.52 (d, *J* = 5.0 Hz, 1H), 8.57 (d, *J* = 5.4 Hz, 1H), 7.60 (d, *J* = 7.8 Hz, 2H), 7.13 (t, *J* = 7.8 Hz, 2H), 6.94 – 6.84 (m, 1H), 6.85 (t, *J* = 7.3 Hz, 1H), 6.74 (m, *J* = 7.7 Hz, 5H), 6.62 (d, *J* = 14.6, 8.3 Hz, 1H), 6.57 – 6.53 (m, 1H), 6.42 (td, *J* = 6.4, 5.7, 1.1 Hz, 1H), 4.70 (s, 1H), 4.15 (s, 3H), 2.68 (s, 1H), 1.44 – 1.31 (m, 3H), 1.26 (d, *J* = 7.0 Hz, 3H), 0.56 – 0.42 (m, 3H), -0.09 – -0.22 (m, 3H);  $^{19}\text{F}\{^1\text{H}\}$  NMR (564 MHz, C<sub>6</sub>D<sub>6</sub>)  $\delta$  -160.63 (dt, *J* = 17.6, 8.6 Hz), -160.76 (dq, *J* = 16.9, 7.7 Hz), -168.16 (t, *J* = 21.5 Hz), -168.94 (t, *J* = 21.5 Hz), -176.16 (tt, *J* = 23.5, 7.7 Hz), -178.04 (tt, *J* = 22.3, 8.0 Hz);  $^{13}\text{C}\{^1\text{H}\}$  NMR (151 MHz, C<sub>6</sub>D<sub>6</sub>)  $\delta$  316.9, 158.0, 157.9, 153.9, 152.5, 150.4, 150.0, 149.6, 147.9, 143.1, 142.4, 141.5, 140.8, 140.0, 139.8, 138.9, 138.1, 137.2, 134.1 (t, *J* = 15.0 Hz), 132.5 (q, *J* = 16.7, 15.2 Hz), 131.0 (t, *J* = 13.2 Hz), 128.4, 127.6, 127.3, 127.1, 126.1, 126.0, 125.8, 123.8, 122.4, 121.4, 120.5, 34.5, 28.0, 27.7, 25.1, 24.3, 22.3. Anal. Calcd. for C<sub>42</sub>H<sub>33</sub>F<sub>10</sub>MoN<sub>3</sub>O<sub>2</sub> (+ 1 C<sub>4</sub>H<sub>8</sub>O): C, 56.97; H, 4.26; N, 4.33. Found: C, 57.22; H, 4.16; N, 4.30.

**Mo(NAr)(CMePh)(Cl)<sub>2</sub>(bipy) (3(bipy)).** Chlorotrimethylsilane (0.091 g, 0.838 mmol) was added to a stirred suspension of Mo(NAr)(CMePh)(OC<sub>6</sub>F<sub>5</sub>)<sub>2</sub>(bipy) (0.188 g, 0.209 mmol) in Et<sub>2</sub>O (6 mL). The reaction was stirred for 12 h during which time an orange solid precipitated. The product was collected on a frit, washed with Et<sub>2</sub>O (4 x 1 mL) and dried *in vacuo*: yield 0.112 g (89%). A crystal suitable for XRD was obtained through layering a concentrated dichloromethane solution with Et<sub>2</sub>O: <sup>1</sup>H NMR (600 MHz, CD<sub>2</sub>Cl<sub>2</sub>, -20 °C) δ 9.4 (d, *J* = 4.2 Hz, 1H), 8.8 (d, *J* = 4.6 Hz, 1H), 8.3 (d, *J* = 8.0 Hz, 1H), 8.2 (d, *J* = 8.0 Hz, 2H), 8.1 – 8.0 (m, 1H), 7.7 – 7.7 (m, 1H), 7.7 – 7.6 (m, 1H), 7.3 (d, *J* = 7.3 Hz, 2H), 7.1 (t, *J* = 7.8 Hz, 2H), 6.9 (dt, *J* = 13.0, 7.1 Hz, 4H), 6.6 (d, *J* = 7.1 Hz, 1H), 4.5 (dt, *J* = 13.2, 6.1 Hz, 1H), 4.1 (s, 2H), 2.7 (dd, *J* = 13.0, 6.2 Hz, 1H), 1.2 (d, *J* = 6.3 Hz, 3H), 1.0 (d, *J* = 6.4 Hz, 3H), 0.3 (d, *J* = 6.4 Hz, 3H), -0.1 (d, *J* = 6.4 Hz, 3H); <sup>13</sup>C{<sup>1</sup>H} NMR (151 MHz, CD<sub>2</sub>Cl<sub>2</sub>, -20 °C) δ 324.2, 159.2, 157.2, 154.4, 152.5, 151.7, 149.2, 148.9, 148.4, 141.0, 139.7, 128.6, 127.8, 127.5, 127.3, 127.0, 126.7, 125.4, 123.8, 123.5, 122.9, 122.5, 38.9, 27.9, 27.5, 25.0, 24.6, 24.1, 22.1. Anal. Calcd. for C<sub>30</sub>H<sub>33</sub>Cl<sub>2</sub>MoN<sub>3</sub> (+1 CH<sub>2</sub>Cl<sub>2</sub>): C, 54.17; H, 5.13; N, 6.11. Found: C, 54.10; H, 5.21; N, 5.72.

**Mo(NAr)(CMePh)(Cl)(OHMT) (4).** A stirred suspension of Mo(NAr)(CMePh)(Cl)<sub>2</sub>(bipy) (0.121 g, 0.202 mmol) in Et<sub>2</sub>O (5 mL) was cooled to -30 °C before adding a -30 °C solution of LiOHMT (0.081 g, 0.242 mmol) and ZnCl<sub>2</sub>•dioxane (0.047 g, 0.209 mmol) in THF (3 mL). The suspension was stirred for 12 hours at 22 °C to yield a ruby red solution and a colorless precipitate. All volatiles were removed from the mixture *in vacuo*, and the residue was extracted with pentane (3 mL). The extract was filtered through Celite and volatiles were removed *in vacuo* to afford a ruby red oil. The oil was dissolved in benzene (0.5 mL) and lyophilized to yield a red foam that aided manipulation: yield 0.307 g (73%). Anal. Calcd. for C<sub>44</sub>H<sub>50</sub>ClMoNO: C, 71.39; H, 6.81; N, 1.89. Found: C, 70.96; H, 6.44; N, 1.67.

**Mo(NAr)(CMePh)(Cl)(OHMT)(MeCN) (4(MeCN)).** Mo(NAr)(CMePh)(Cl)(OHMT) (0.010 g, 0.014 mmol) was added to CD<sub>3</sub>CN (0.5 mL) to produce a yellow solution. A crystal suitable for XRD was obtained by cooling a concentrated solution of a toluene:MeCN:pentane (1:1:2) mixture at -30 °C for 24 h: <sup>1</sup>H NMR (600 MHz, C<sub>6</sub>D<sub>6</sub>) δ 7.1 (d, *J* = 7.7 Hz, 2H), 7.0 – 6.9 (m, 10H), 6.8 (s, 2H), 6.7 (tt, *J* = 14.7, 2.4 Hz, 1H), 3.7 (hept, *J* = 6.3, 5.7 Hz, 2H), 3.0 (s, 3H), 2.5 (s, 6H), 2.4 (s, 6H), 2.3 (s, 6H), 1.3 (d, *J* = 6.8 Hz, 6H), 1.2 (d, *J* = 6.7 Hz, 6H), 0.6 (s, 3H); <sup>13</sup>C{<sup>1</sup>H} NMR (151 MHz, C<sub>6</sub>D<sub>6</sub>) δ 296.8, 160.1, 152.9, 148.6, 146.8, 137.2, 137.1, 136.8, 136.2, 131.8, 129.8, 128.9, 128.5, 128.4, 127.8, 126.1, 123.3, 121.7, 118.4, 38.9, 28.5, 24.0, 23.9, 22.1, 21.2, 21.2, 21.0, 0.4. <sup>1</sup>H NMR (600 MHz, CD<sub>3</sub>CN) Major Isomer: δ 7.2 – 7.2 (m, 2H), 7.1 – 7.0 (s, 5H), 7.0 – 7.0 (m, 1H), 7.0 – 7.0 (s, 1H), 7.0 – 6.9 (m, 2H), 6.9 – 6.8 (m, 2H), 6.8 (s, 1H), 6.8 (s, 1H), 3.4 (s, 1H), 3.2 (dq, *J* = 13.4, 6.8 Hz, 1H), 2.6 (s, 3H), 2.2 (s, 6H), 2.2 (s, 6H), 2.1 (s, 3H), 2.0 (s, 3H), 1.9 (s, 3H), 1.0 (d, *J* = 5.6 Hz, 6H), 0.9 (d, *J* = 6.8 Hz, 3H), 0.9 (d, *J* = 6.8 Hz, 3H); <sup>13</sup>C{<sup>1</sup>H} NMR (151 MHz, CD<sub>3</sub>CN) Major Isomer: δ 323.6, 161.7, 152.0, 150.5, 138.0, 137.8, 137.5, 137.4, 137.1, 137.0, 131.4, 131.3, 130.4, 130.2, 129.8, 129.6, 129.4, 129.0, 128.7, 128.6, 128.4, 128.2, 128.1, 127.1, 126.9, 126.1, 125.7, 123.7, 121.1, 28.4, 28.3, 27.7, 26.9, 24.9, 23.6, 23.1, 21.6, 21.3, 21.1, 21.1, 21.0, 20.7, 20.4. Selected resonances of the minor isomer: <sup>1</sup>H NMR (600 MHz, CD<sub>3</sub>CN) δ 6.8 (s), 6.7 (s), 2.8 (s), 2.3 (s), 2.3 (s), 1.0 (bs); <sup>13</sup>C{<sup>1</sup>H} NMR (151 MHz, CD<sub>3</sub>CN) 160.8, 151.2, 147.6, 135.1, 129.1, 25.0, 23.0.

*Note: Yellow crystals of 4(MeCN) readily lose MeCN under vacuum (10<sup>-2</sup> mbar, 10 minutes) and turn red. For this reason elemental analysis for 4(MeCN) could not be obtained.*

**Mo(NAr)(CMePh)(OHMT)(NC<sub>4</sub>H<sub>4</sub>) (5).** A chilled (−30 °C) solution of Mo(NAr)(CMePh)(Cl)(OHMT) (0.100 g, 0.135 mmol) in Et<sub>2</sub>O (4 mL) was added to a suspension of sodium pyrrolide (0.013 g, 0.135 mmol) in Et<sub>2</sub>O (3 mL) that had been cooled to −30 °C. The reaction was stirred 2 hours during which time an orange/red solution was obtained along with a precipitate. Volatiles were removed *in vacuo* and the residue was extracted into pentane (3 x 1 mL). The extract was filtered through Celite and the volatiles removed from the filtrate *in vacuo* to afford the product as an orange/red foam: yield 0.060 g (72%). A crystal suitable for XRD was obtained through slow evaporation of a concentrated heptane solution into silicon grease at −30 °C: <sup>1</sup>H NMR (600 MHz, C<sub>6</sub>D<sub>6</sub>) δ 7.4 (d, *J* = 7.4 Hz, 2H), 7.2 - 7.0 (m, 10H), 7.0 (s, 2H), 6.9 (t, *J* = 7.3 Hz, 1H), 6.57 (t, *J* = 1.7 Hz, 2H), 6.40 (t, *J* = 1.7 Hz, 2H), 3.3 (hept, *J* = 6.6 Hz, 2H), 2.7 (s, 3H), 2.5 (s, 6H), 2.3 (s, 6H), 2.2 (s, 6H), 1.1 (d, *J* = 6.8 Hz, 6H), 1.0 (d, *J* = 6.7 Hz, 6H); <sup>13</sup>C{<sup>1</sup>H} NMR (151 MHz, C<sub>6</sub>D<sub>6</sub>) δ 290.6, 159.2, 152.6, 148.5, 146.7, 137.4, 137.1, 136.9, 136.4, 132.1, 130.0, 128.8, 128.8, 128.6, 127.7, 126.8, 123.2, 122.7, 110.6, 28.7, 24.0, 23.5, 21.2, 20.9, 20.6, 20.2. Anal. Calcd. for C<sub>48</sub>H<sub>54</sub>MoN<sub>2</sub>O: C, 74.78; H, 7.06; N, 3.63. Found: C, 74.60; H, 7.05; N, 3.62.

## Spectroscopic Data

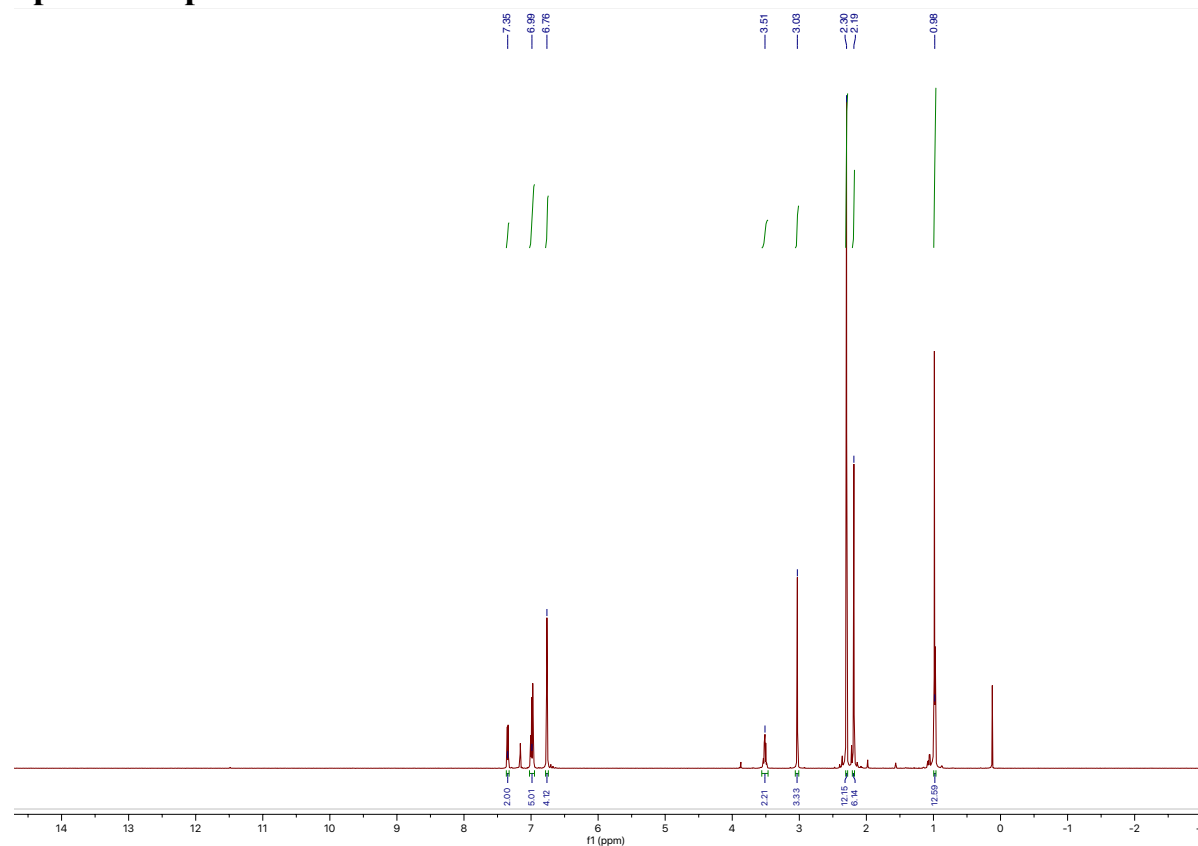

**Figure S1.** <sup>1</sup>H NMR spectrum of Mo(NAr)(CMePh)(OMes)<sub>2</sub> recorded at 600 MHz in C<sub>6</sub>D<sub>6</sub>.

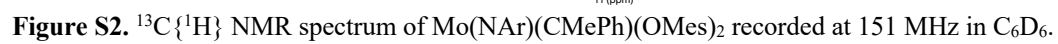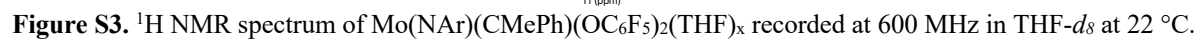

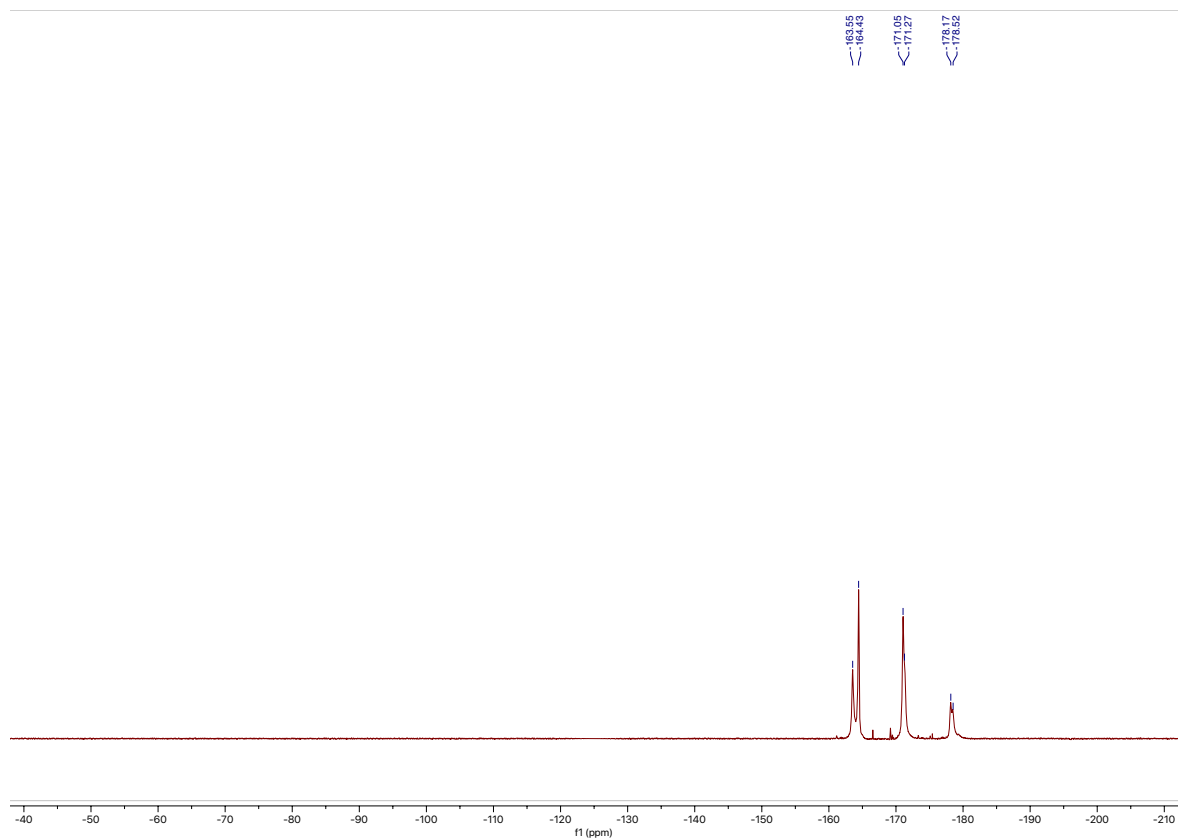

**Figure S4.**  $^{19}\text{F}\{^1\text{H}\}$  NMR spectrum of  $\text{Mo}(\text{NAr})(\text{CMePh})(\text{OC}_6\text{F}_5)_2(\text{THF})_x$  recorded at 565 MHz in  $\text{THF-}d_8$  at 22 °C.

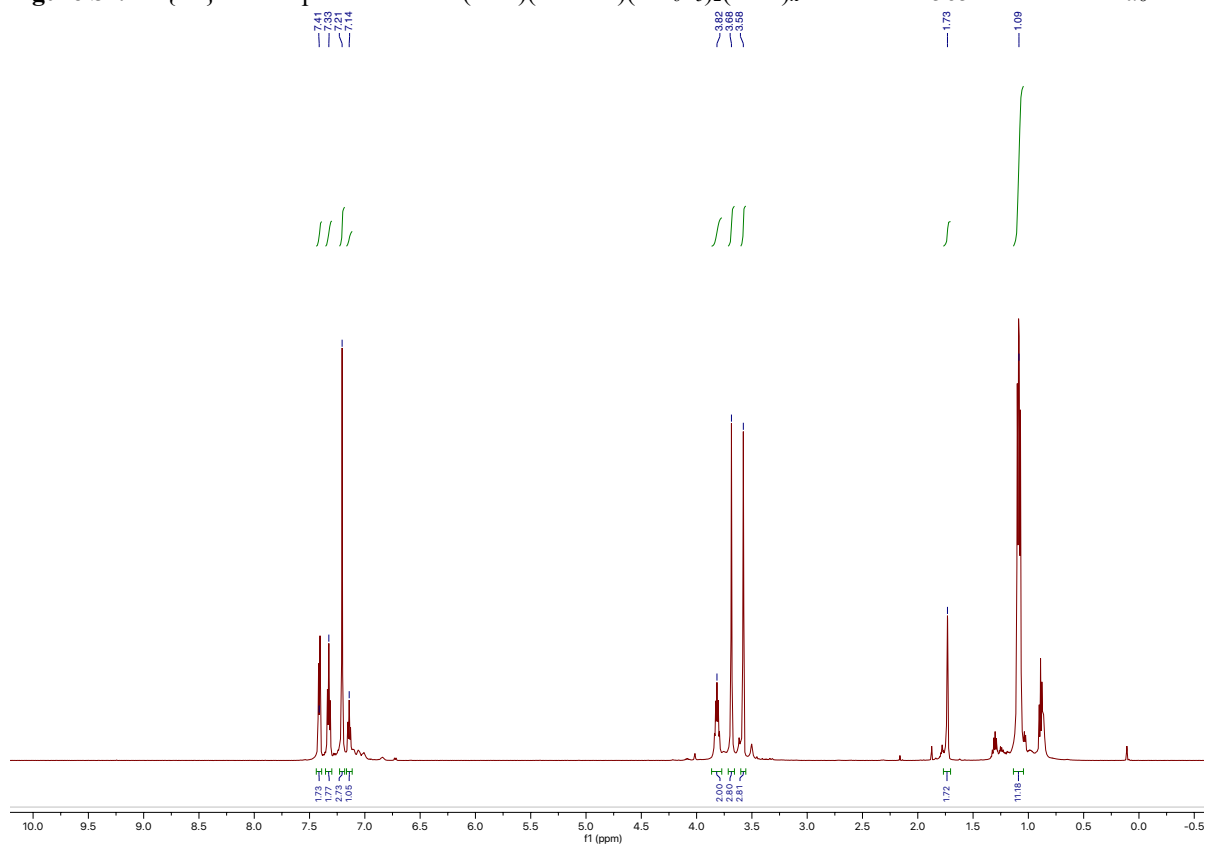

**Figure S5.**  $^1\text{H}$  NMR spectrum of  $\text{Mo}(\text{NAr})(\text{CMePh})(\text{OC}_6\text{F}_5)_2(\text{THF})_x$  recorded at 600 MHz in  $\text{THF-}d_8$  at -40 °C.

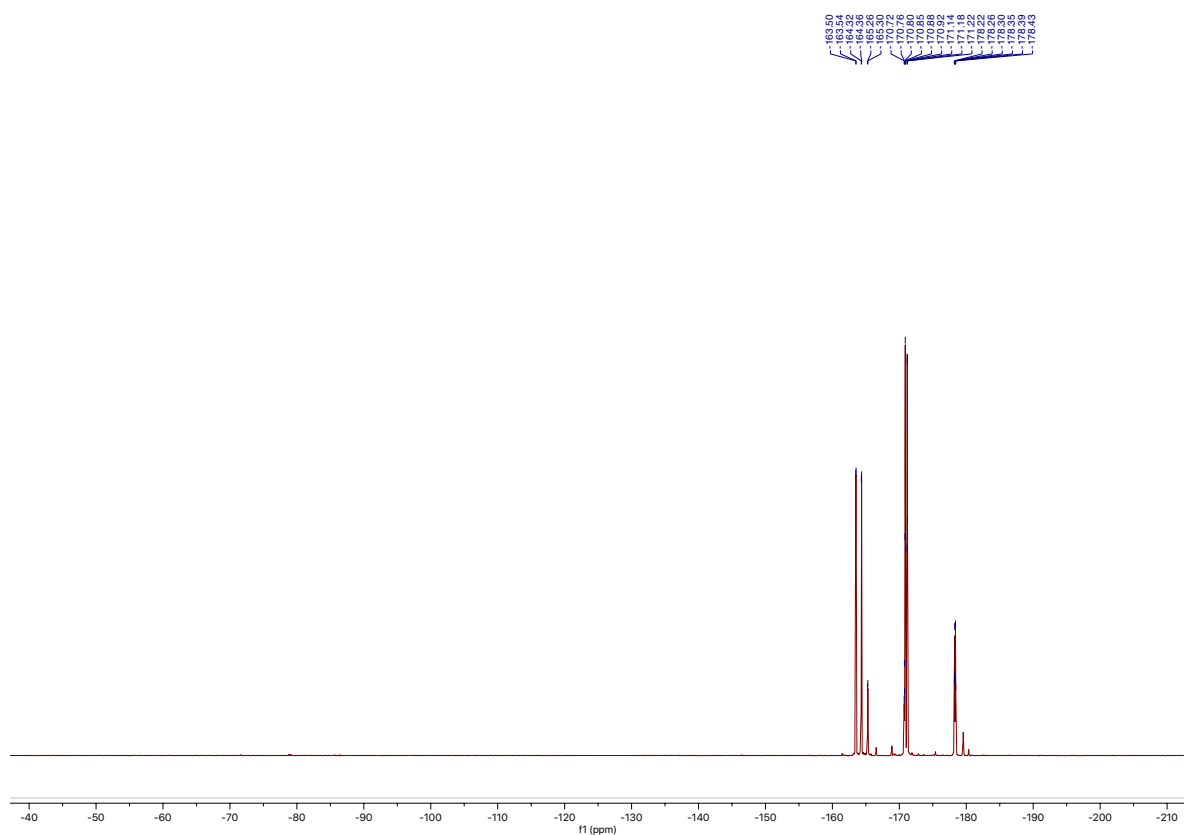

**Figure S6.**  $^{19}\text{F}\{^1\text{H}\}$  NMR spectrum of  $\text{Mo}(\text{NAr})(\text{CMePh})(\text{OC}_6\text{F}_5)_2(\text{THF})_x$  recorded at 565 MHz in  $\text{THF}-d_8$  at  $-40^\circ\text{C}$ .

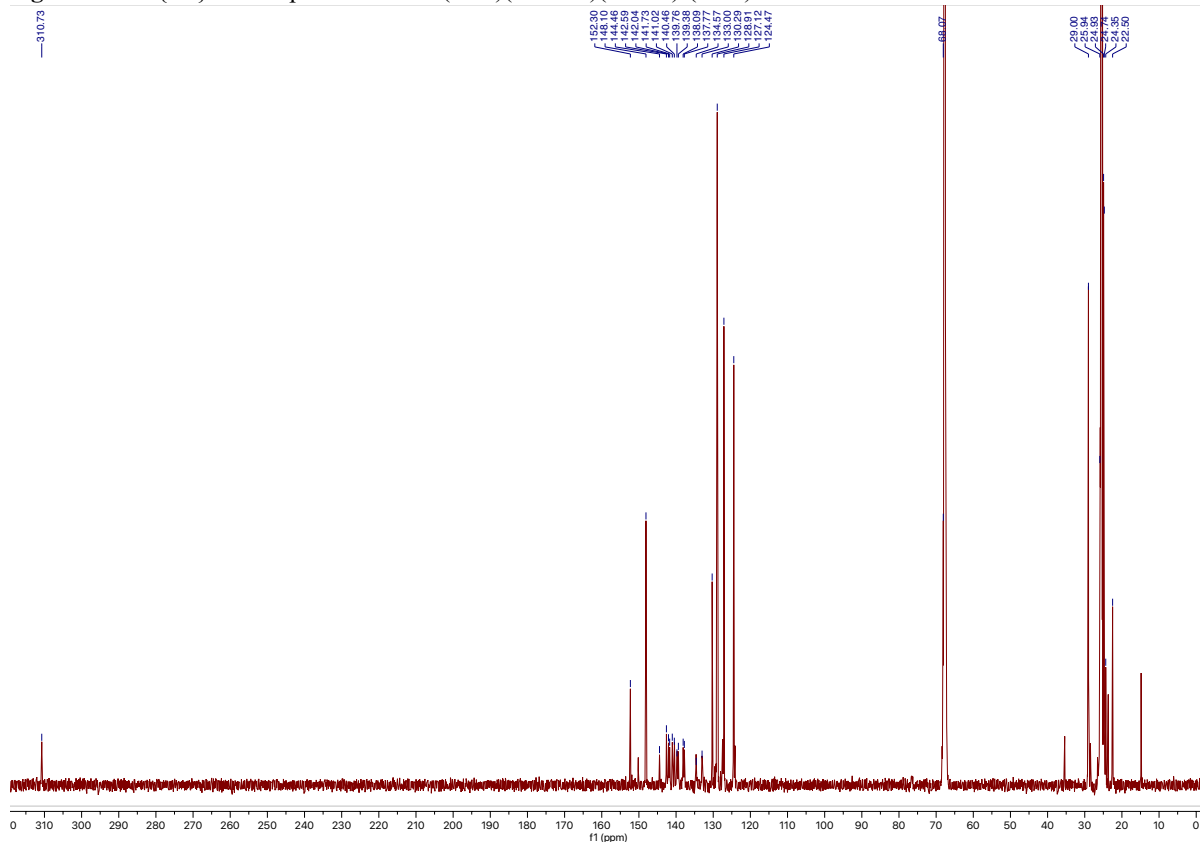

**Figure S7.**  $^{13}\text{C}\{^1\text{H}\}$  NMR spectrum of  $\text{Mo}(\text{NAr})(\text{CMePh})(\text{OC}_6\text{F}_5)_2(\text{THF})_x$  recorded at 151 MHz in  $\text{THF}-d_8$  at  $-40^\circ\text{C}$ .



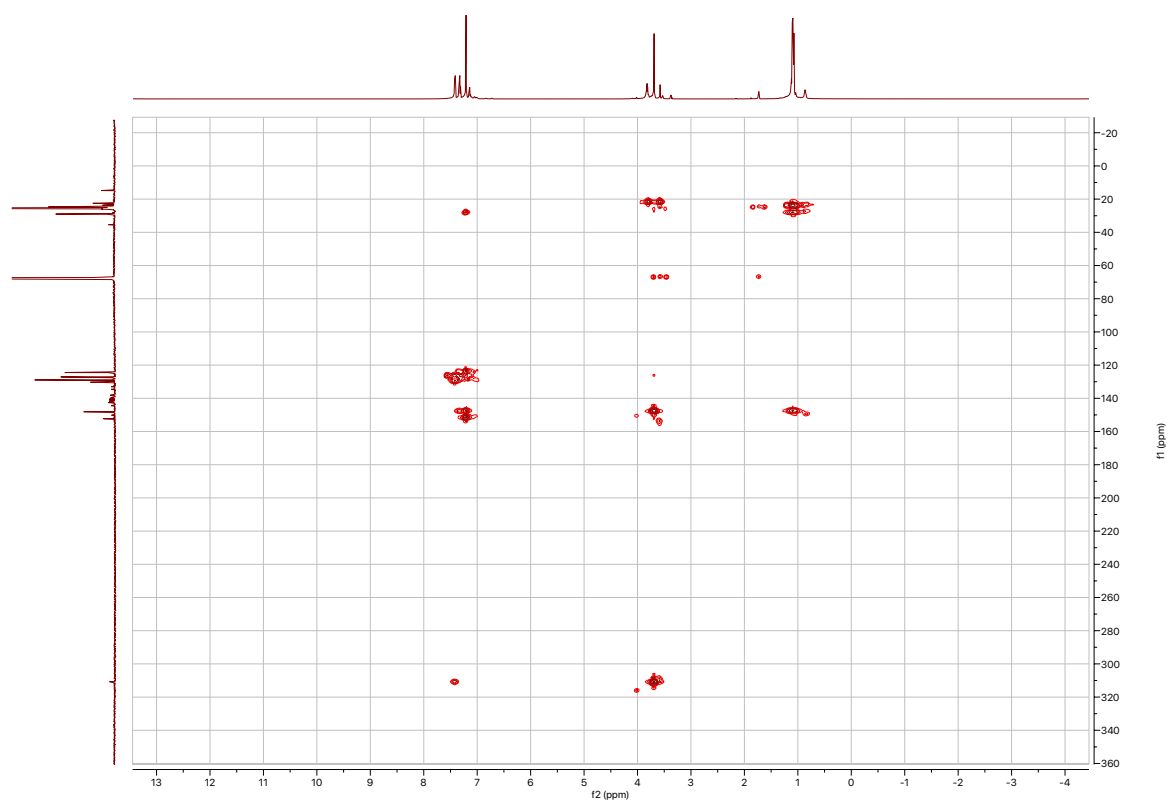

**Figure S8.**  $^{13}\text{C}$ ,  $^1\text{H}$ -HMBC NMR spectrum of  $\text{Mo}(\text{NAr})(\text{CMePh})(\text{OC}_6\text{F}_5)_2(\text{THF})_x$  recorded at 600 MHz in  $\text{THF}-d_8$  at  $-40^\circ\text{C}$ .

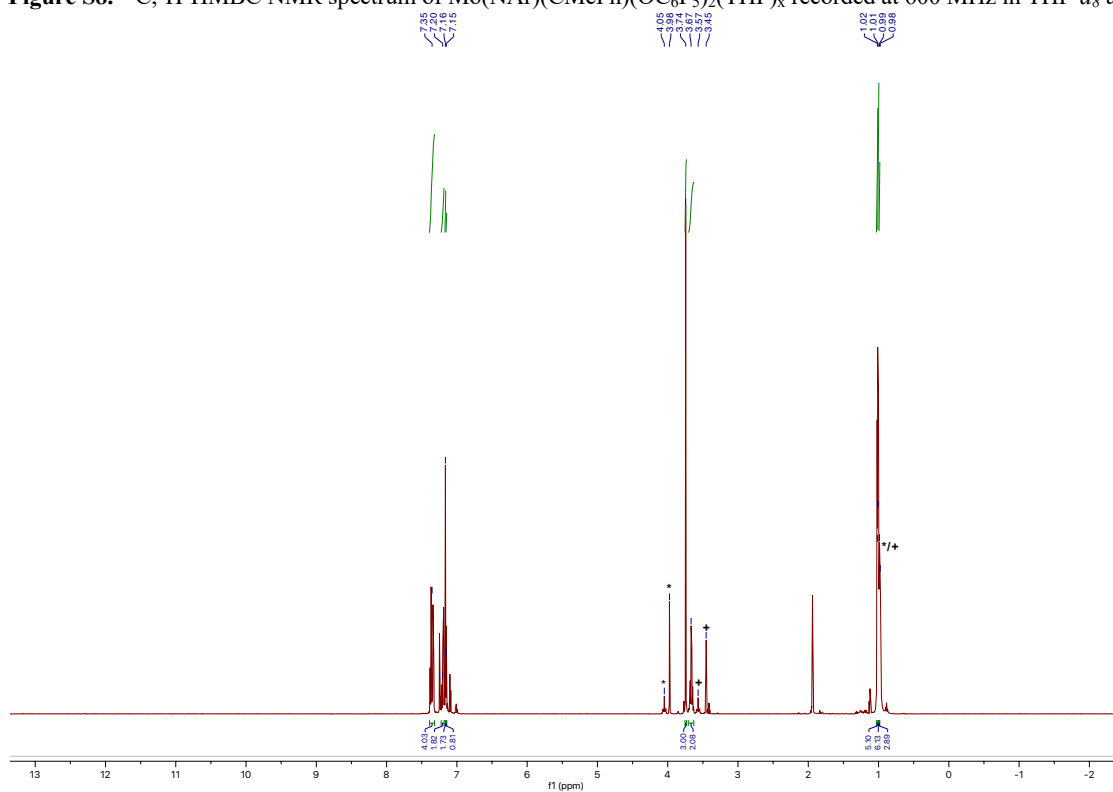

**Figure S9.**  $^1\text{H}$  NMR spectrum of  $\text{Mo}(\text{NAr})(\text{CMePh})(\text{OC}_6\text{F}_5)_2(\text{MeCN})$  recorded at 600 MHz in  $\text{CD}_3\text{CN}$ . The asterisk (\*) and plus (+) symbols denote resonances for isomers 1 and 2, respectively, which are proposed to be  $\text{Mo}(\text{NAr})(\text{CMePh})(\text{OC}_6\text{F}_5)_2(\text{MeCN})_2$  complexes.

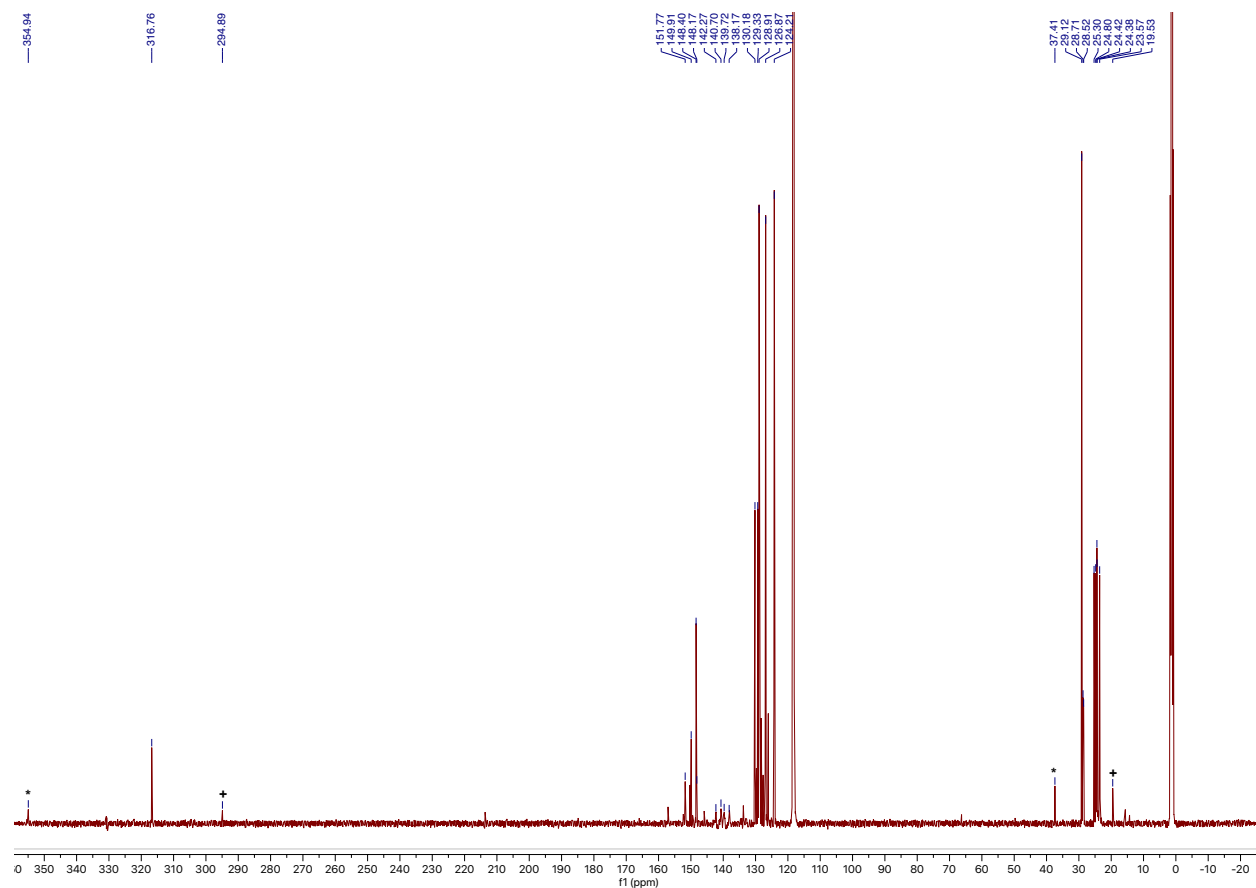

**Figure S10.**  $^{13}\text{C}\{^1\text{H}\}$  NMR spectrum of  $\text{Mo}(\text{NAr})(\text{CMePh})(\text{OC}_6\text{F}_5)_2(\text{MeCN})$  recorded at 151 MHz in  $\text{CD}_3\text{CN}$ . The asterisk (\*) and plus (+) symbols denotes resonances for isomers 1 and 2, respectively, which are proposed to be  $\text{Mo}(\text{NAr})(\text{CMePh})(\text{OC}_6\text{F}_5)_2(\text{MeCN})_2$  complexes.

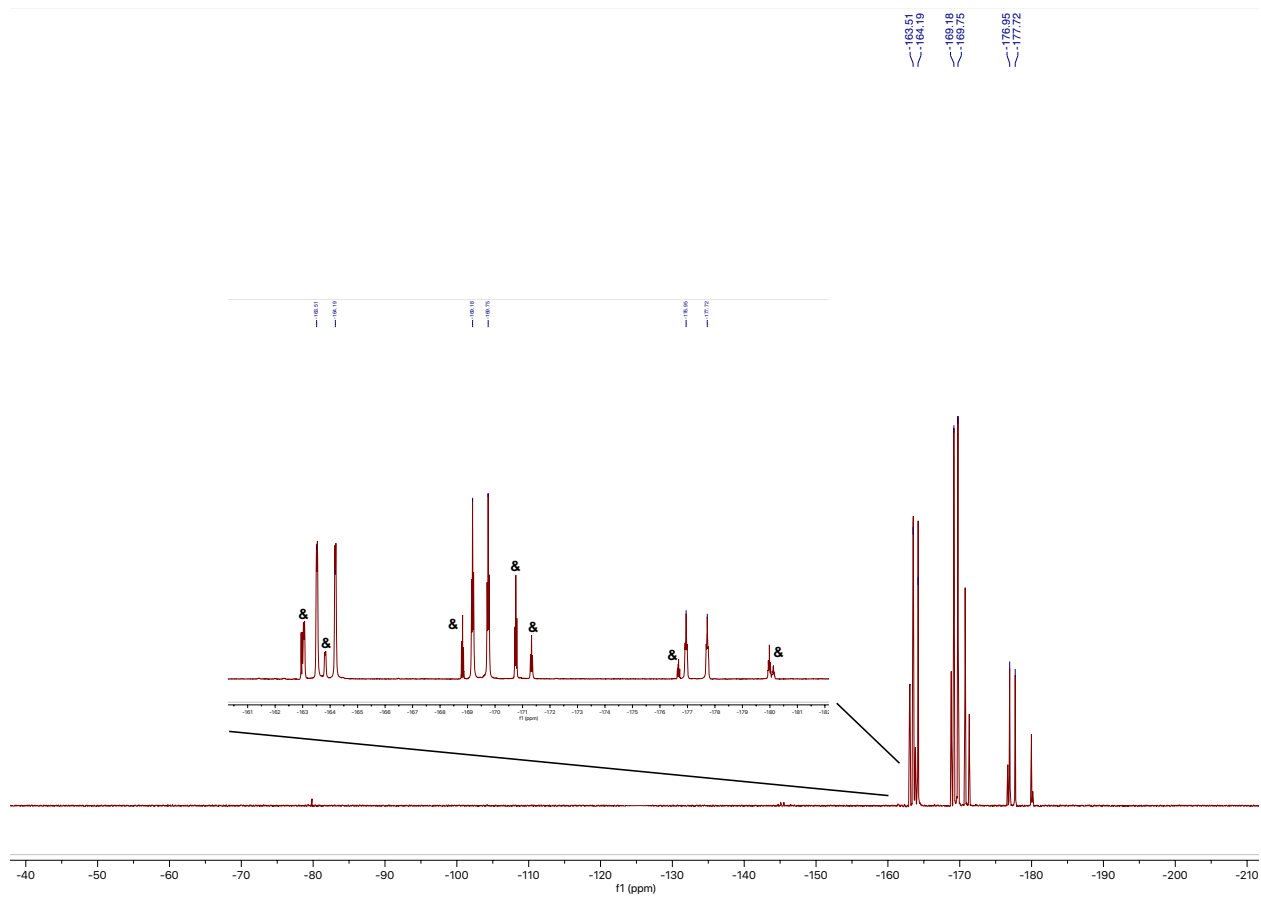

**Figure S11.**  $^{19}\text{F}\{^1\text{H}\}$  NMR spectrum of  $\text{Mo}(\text{NAr})(\text{CMePh})(\text{OC}_6\text{F}_5)_2(\text{MeCN})$  recorded at 564 MHz in  $\text{CD}_3\text{CN}$ . The ampersand (&) denotes resonances for isomers 1 and 2, which are proposed to be  $\text{Mo}(\text{NAr})(\text{CMePh})(\text{OC}_6\text{F}_5)_2(\text{MeCN})_2$  complexes.

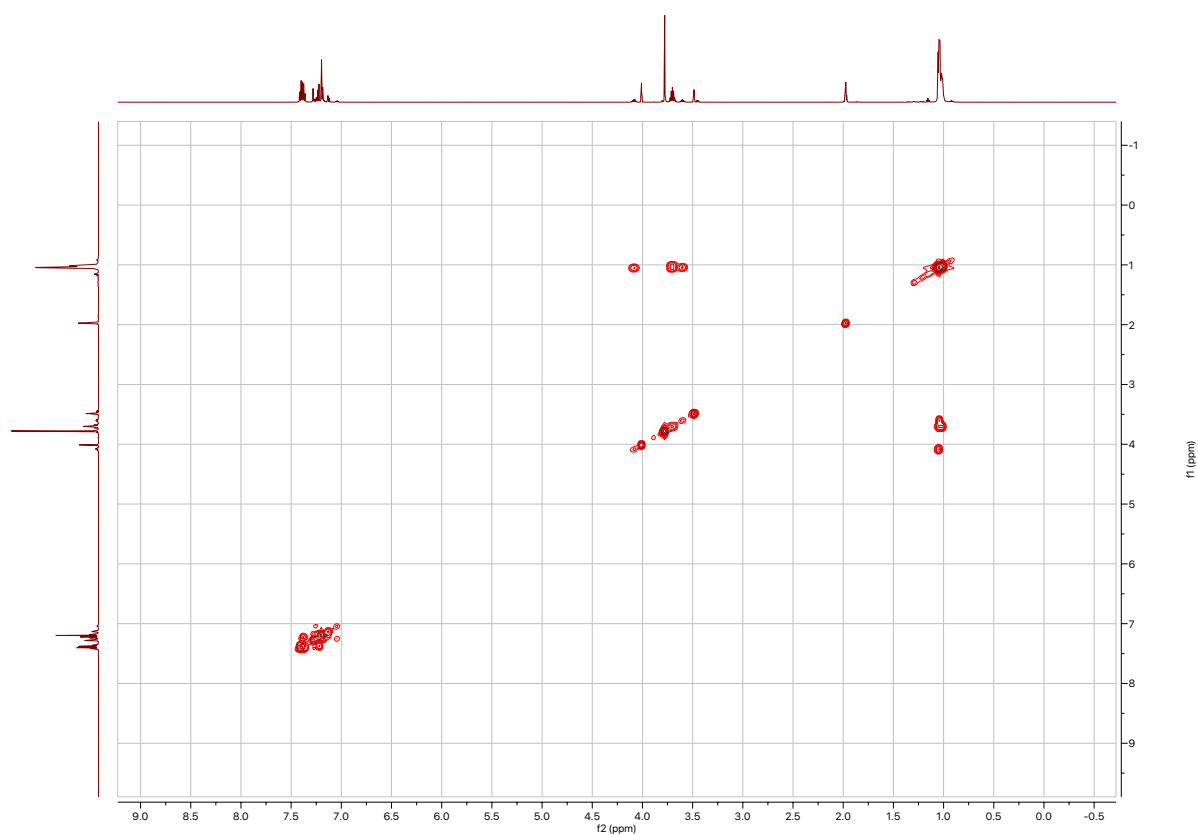

**Figure S12.**  $^1\text{H}$ ,  $^1\text{H}$ -COSY NMR spectrum of  $\text{Mo}(\text{NAr})(\text{CMePh})(\text{OC}_6\text{F}_5)_2(\text{MeCN})$  recorded at 600 MHz in  $\text{CD}_3\text{CN}$ .

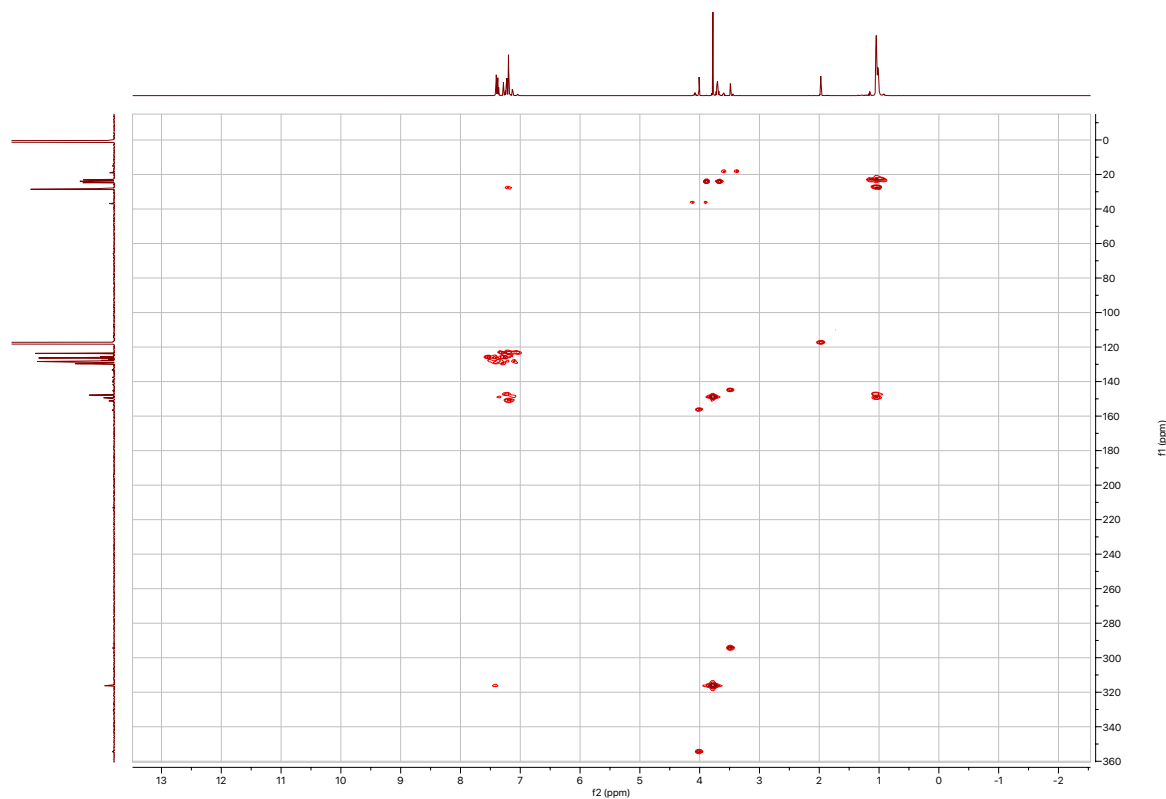

**Figure S13.**  $^{13}\text{C}$ ,  $^1\text{H}$ -HMBC NMR spectrum of  $\text{Mo}(\text{NAr})(\text{CMePh})(\text{OC}_6\text{F}_5)_2(\text{MeCN})$  recorded at 151 MHz in  $\text{CD}_3\text{CN}$ .

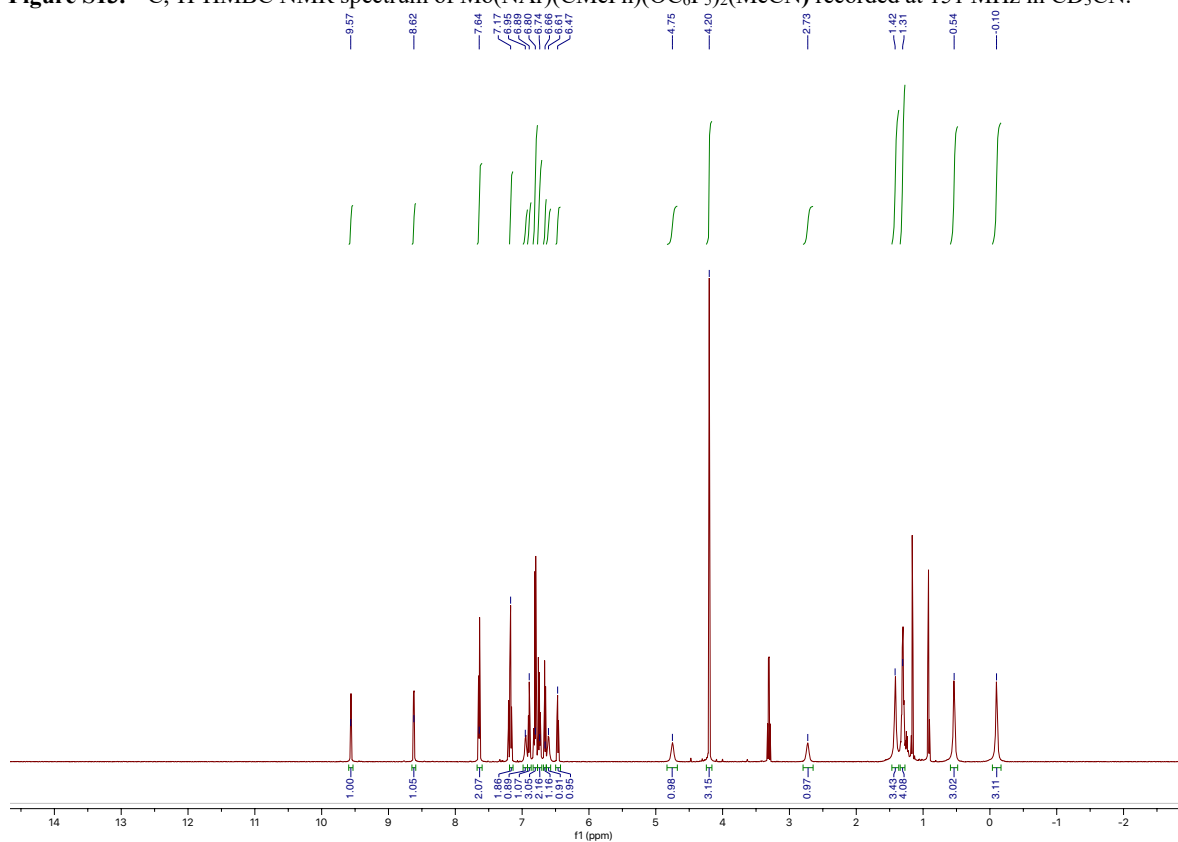

**Figure S14.**  $^1\text{H}$  NMR spectrum of  $\text{Mo}(\text{NAr})(\text{CMePh})(\text{OC}_6\text{F}_5)_2(\text{bipy})$  recorded at 600 MHz in  $\text{C}_6\text{D}_6$ .

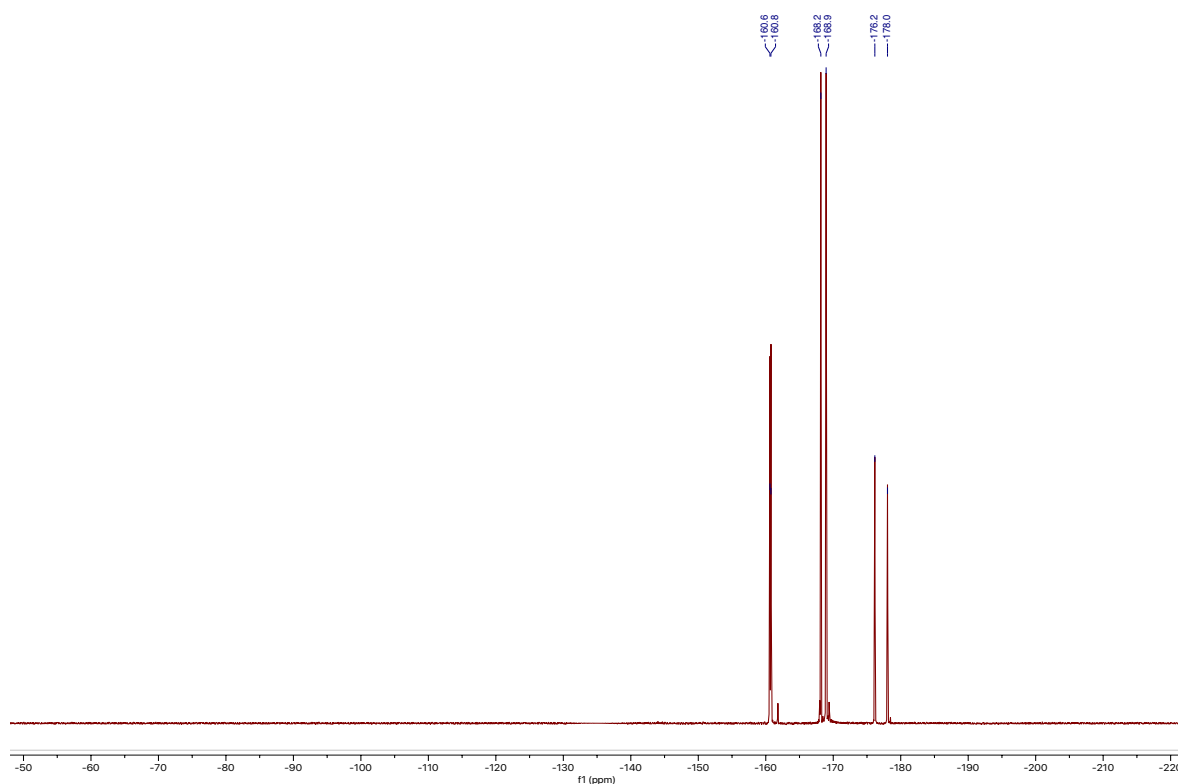

**Figure S15.**  $^{19}\text{F}\{^1\text{H}\}$  NMR spectrum of  $\text{Mo}(\text{NAr})(\text{CMePh})(\text{OC}_6\text{F}_5)_2(\text{bipy})$  recorded at 565 MHz in  $\text{C}_6\text{D}_6$ .

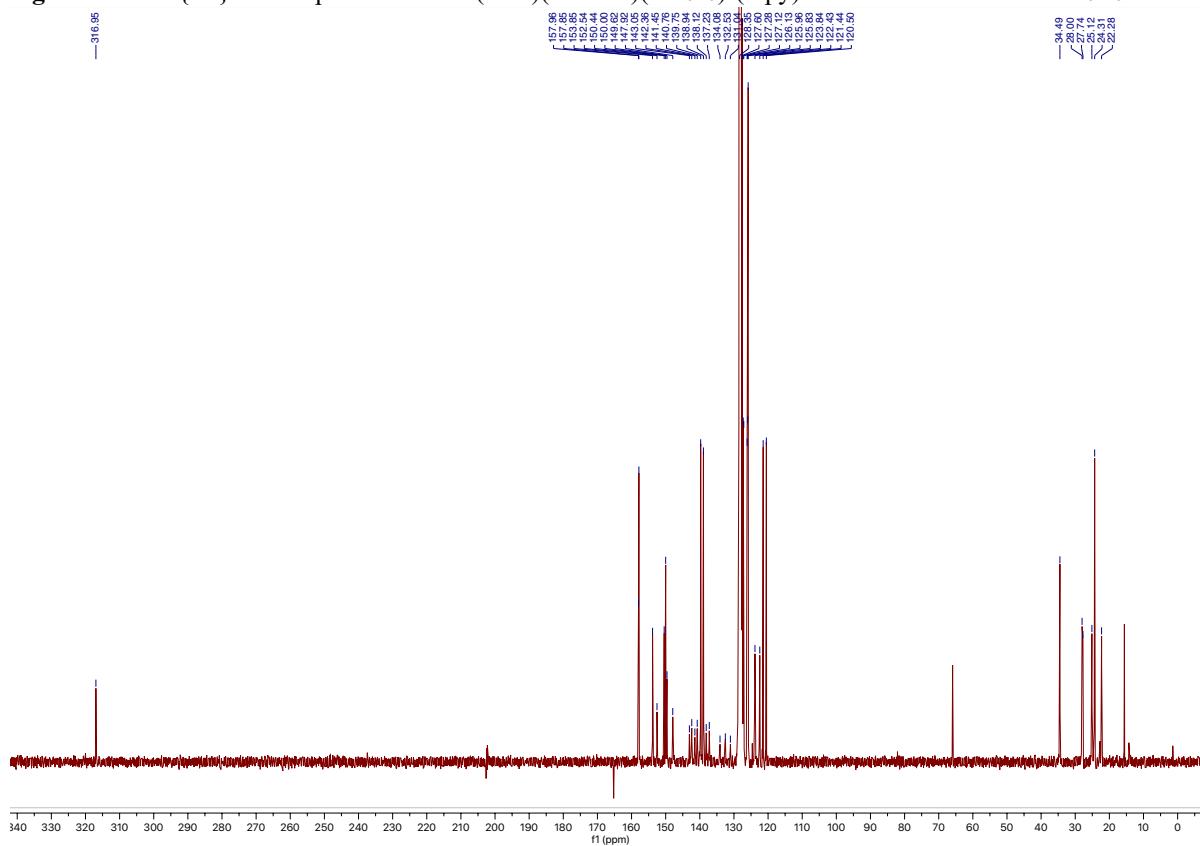

**Figure S16.**  $^{13}\text{C}\{^1\text{H}\}$  NMR spectrum of  $\text{Mo}(\text{NAr})(\text{CMePh})(\text{OC}_6\text{F}_5)_2(\text{bipy})$  recorded at 151 MHz in  $\text{C}_6\text{D}_6$ .

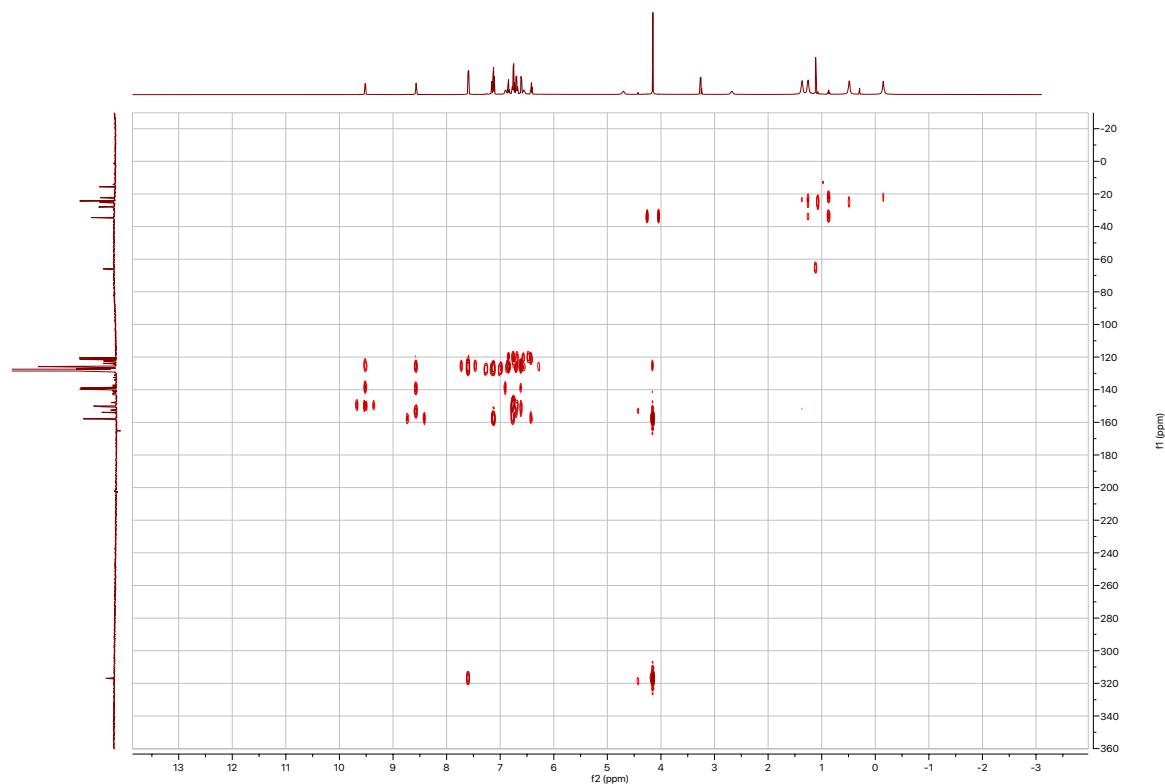

**Figure S17.**  $^{13}\text{C}$ ,  $^1\text{H}$ -HMBC NMR spectrum of  $\text{Mo}(\text{NAr})(\text{CMePh})(\text{OC}_6\text{F}_5)_2(\text{bipy})$  recorded at 151 MHz in  $\text{C}_6\text{D}_6$ .

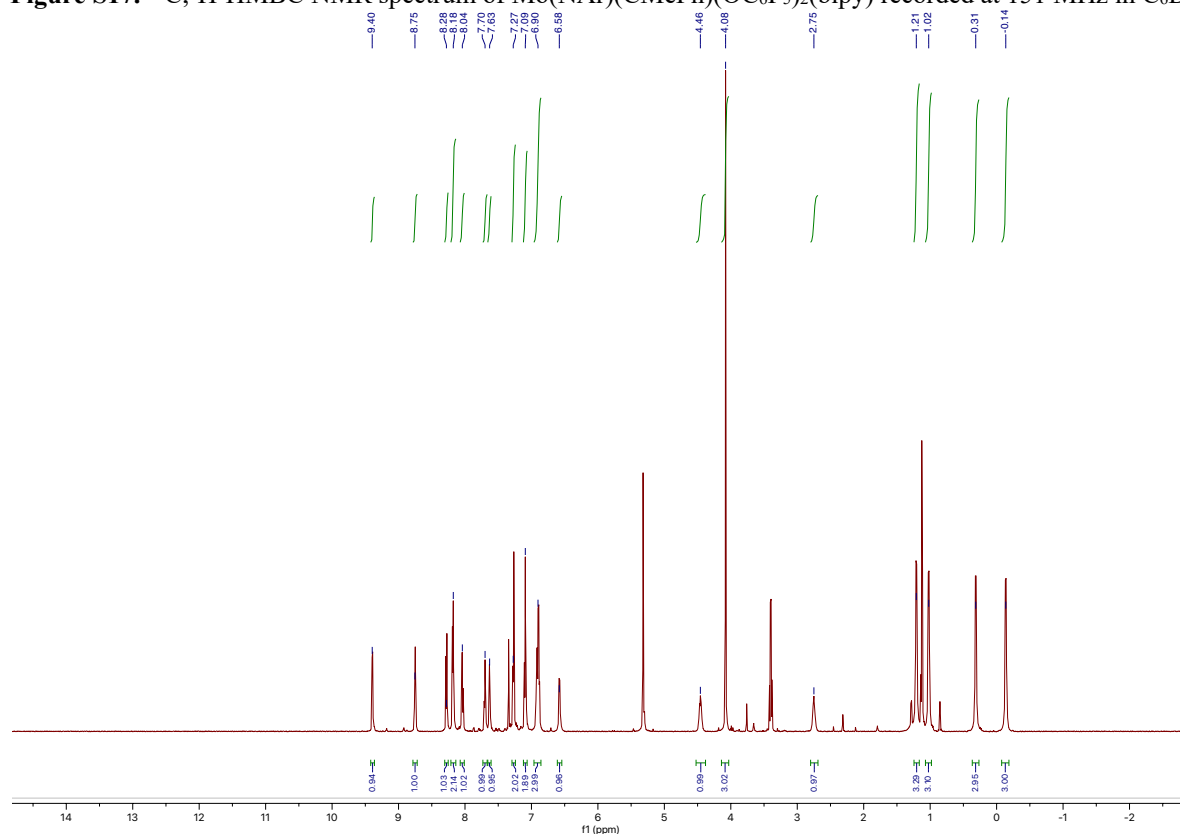

**Figure S18.**  $^1\text{H}$  NMR spectrum of  $\text{Mo}(\text{NAr})(\text{CMePh})(\text{Cl})_2(\text{bipy})$  recorded at 600 MHz in  $\text{CD}_2\text{Cl}_2$  at  $-40^\circ\text{C}$ .

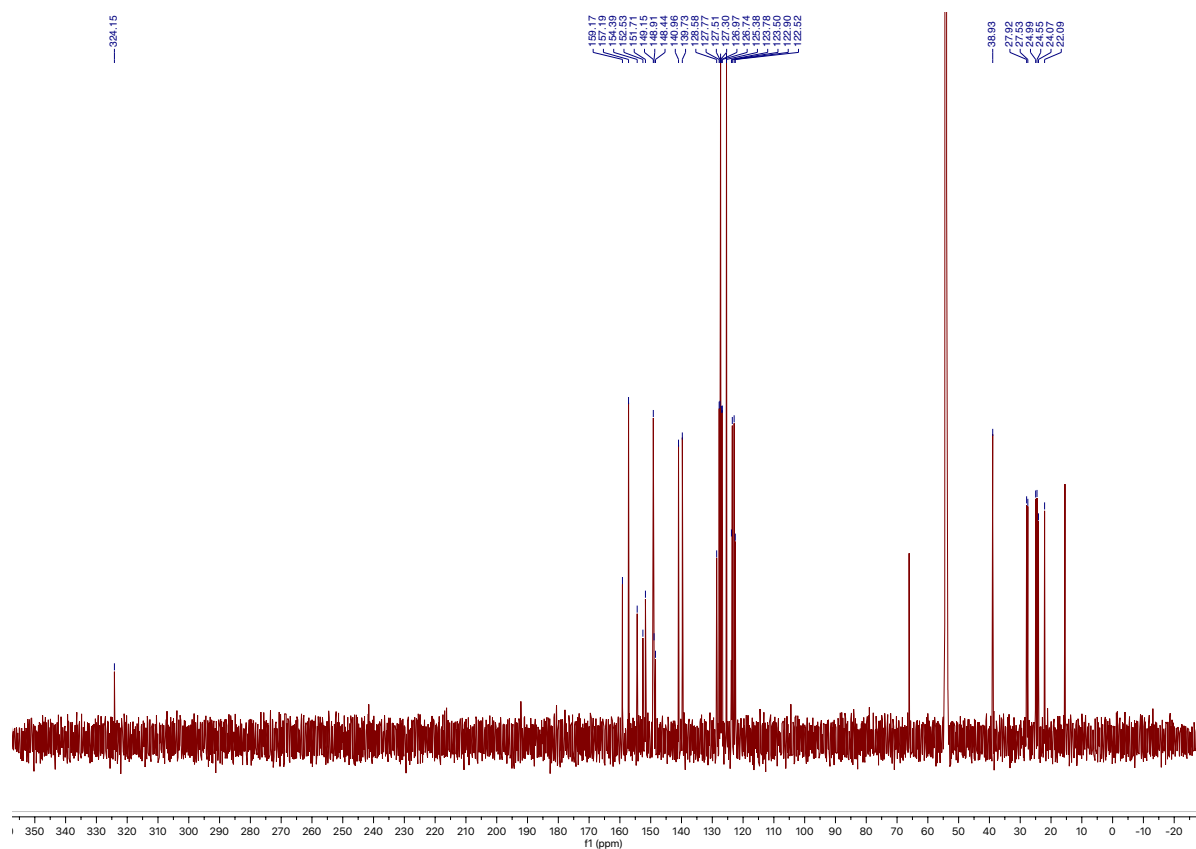

**Figure S19.**  $^{13}\text{C}\{^1\text{H}\}$  NMR spectrum of  $\text{Mo}(\text{NAr})(\text{CMePh})(\text{Cl})_2(\text{bipy})$  recorded at 151 MHz in  $\text{CD}_2\text{Cl}_2$  at  $-40^\circ\text{C}$ .

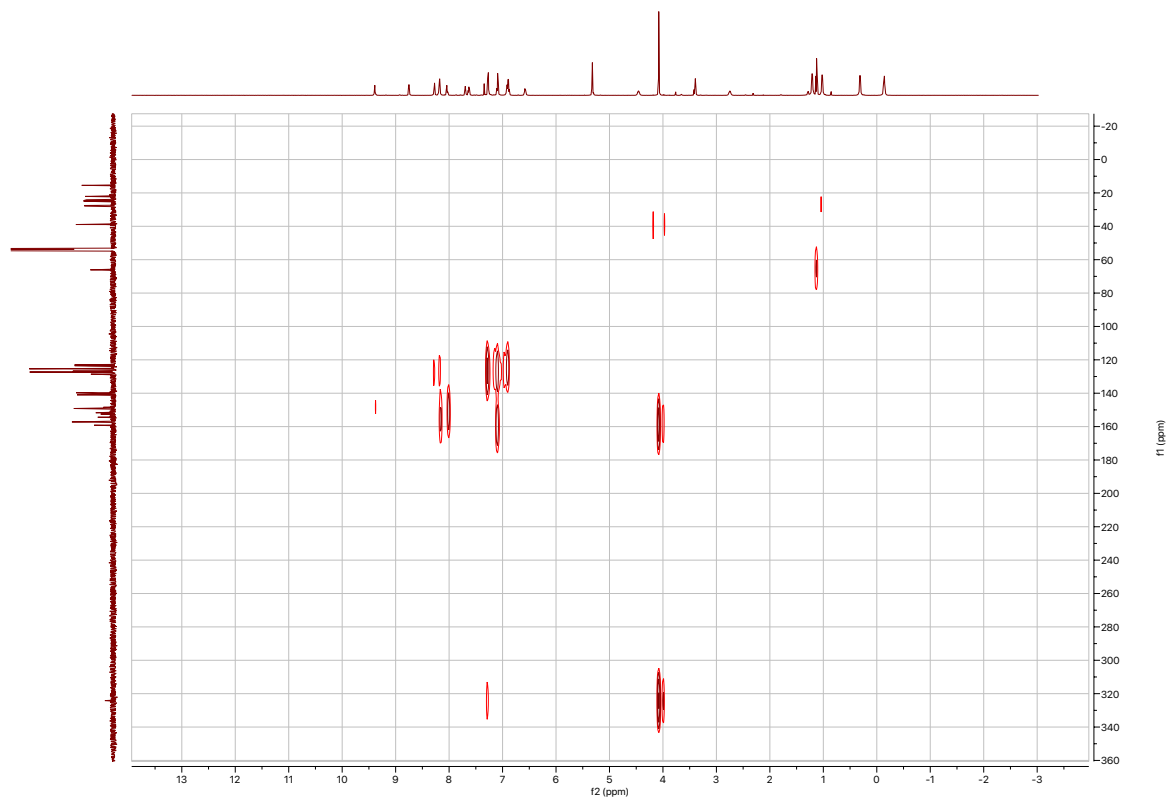

**Figure S20.**  $^{13}\text{C},^1\text{H}$ -HMBC NMR spectrum of  $\text{Mo}(\text{NAr})(\text{CMePh})(\text{Cl})_2(\text{bipy})$  recorded at 151 MHz in  $\text{CD}_2\text{Cl}_2$  at  $-40^\circ\text{C}$ .



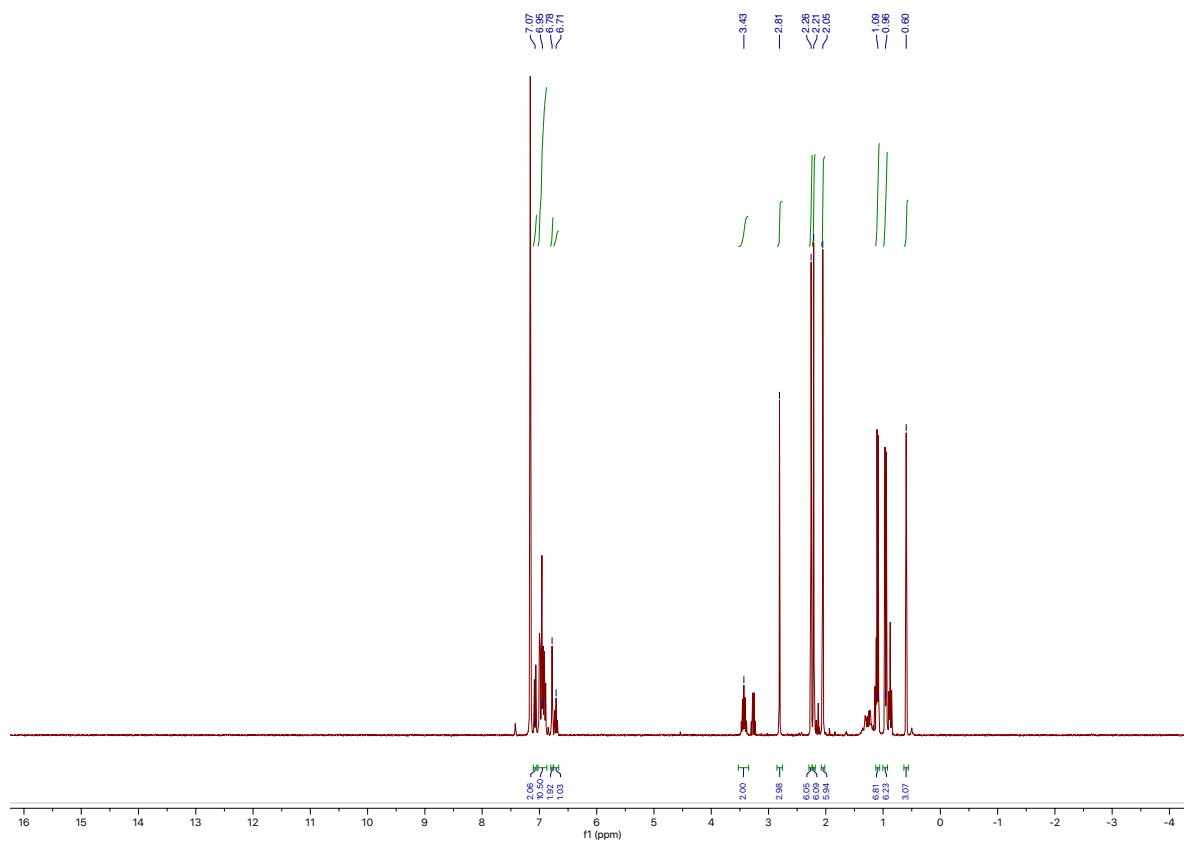

**Figure S21.** <sup>1</sup>H NMR spectrum of Mo(NAr)(CMePh)(Cl)(OHMT)(MeCN) recorded at 600 MHz in C<sub>6</sub>D<sub>6</sub>.

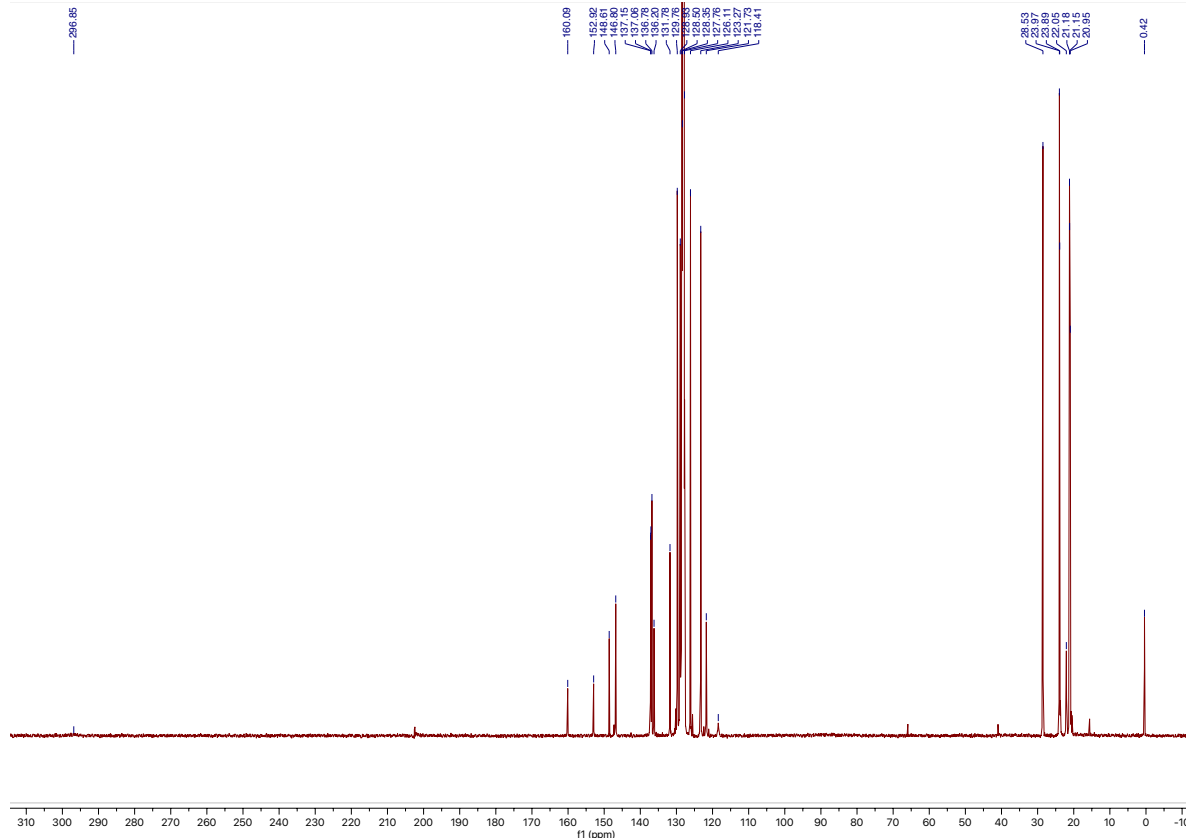

**Figure S22.** <sup>13</sup>C{<sup>1</sup>H} NMR spectrum of Mo(NAr)(CMePh)(Cl)(OHMT)(MeCN) recorded at 151 MHz in C<sub>6</sub>D<sub>6</sub>.

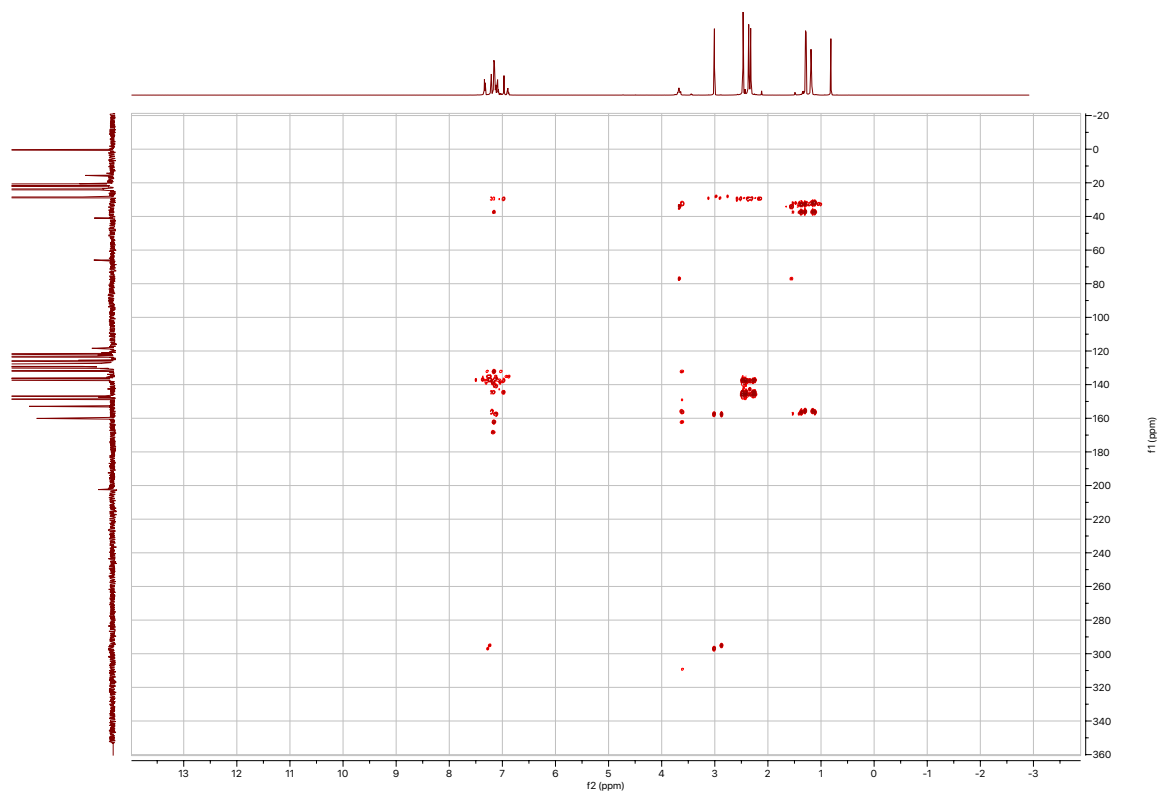

**Figure S23.**  $^{13}\text{C}, ^1\text{H}$ -HMBC NMR spectrum of  $\text{Mo}(\text{NAr})(\text{CMePh})(\text{Cl})(\text{OHMT})(\text{MeCN})$  recorded at 151 MHz in  $\text{C}_6\text{D}_6$ .

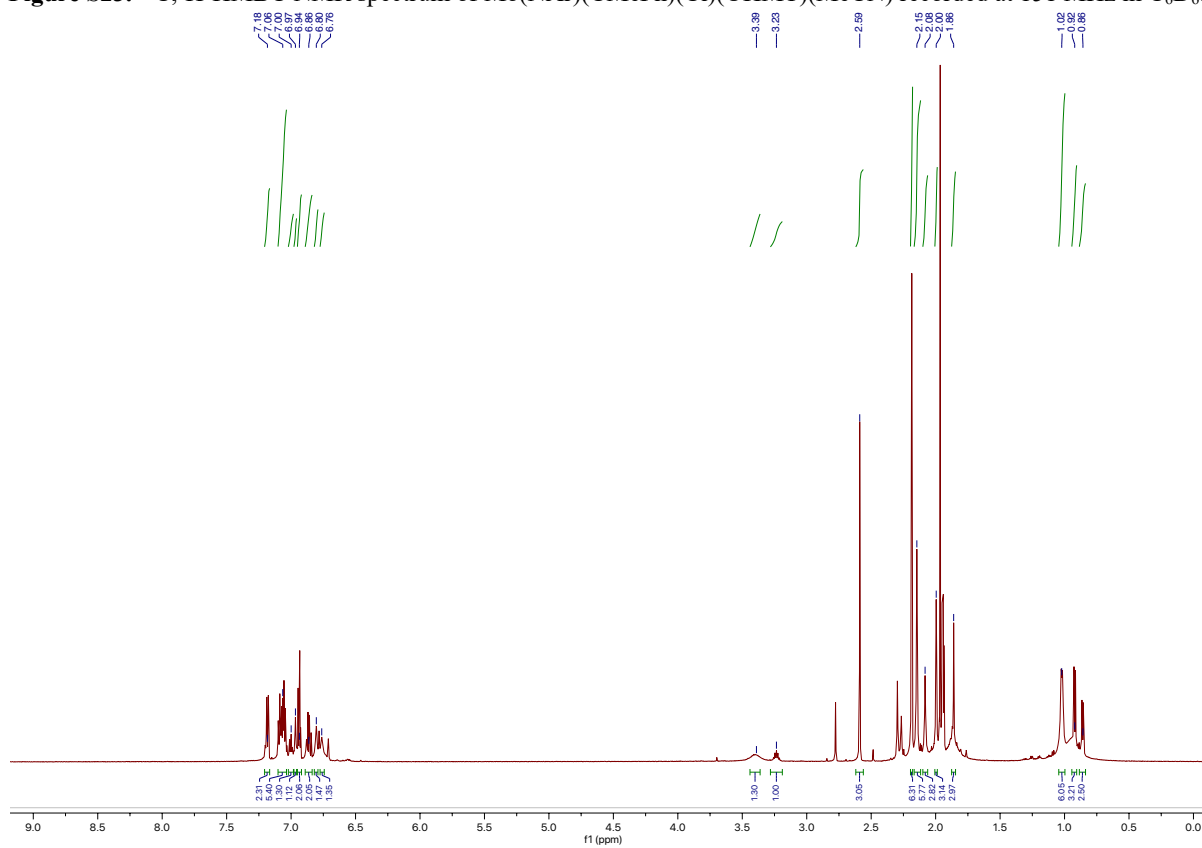

**Figure S24.**  $^1\text{H}$  NMR spectrum of  $\text{Mo}(\text{NAr})(\text{CMePh})(\text{Cl})(\text{OHMT})(\text{MeCN})$  recorded at 600 MHz in  $\text{CD}_3\text{CN}$ .

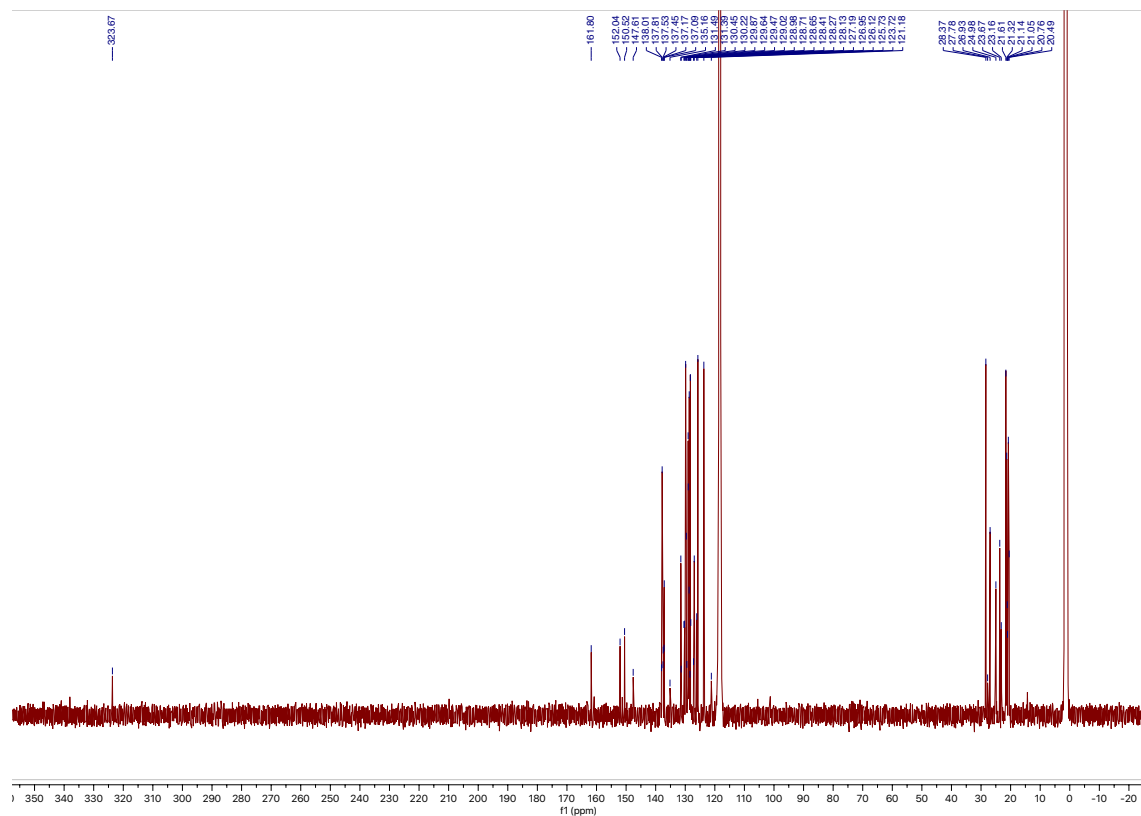

**Figure S25.**  $^{13}\text{C}\{^1\text{H}\}$  NMR spectrum of  $\text{Mo}(\text{NAr})(\text{CMePh})(\text{Cl})(\text{OHMT})(\text{MeCN})$  recorded at 151 MHz in  $\text{CD}_3\text{CN}$ .

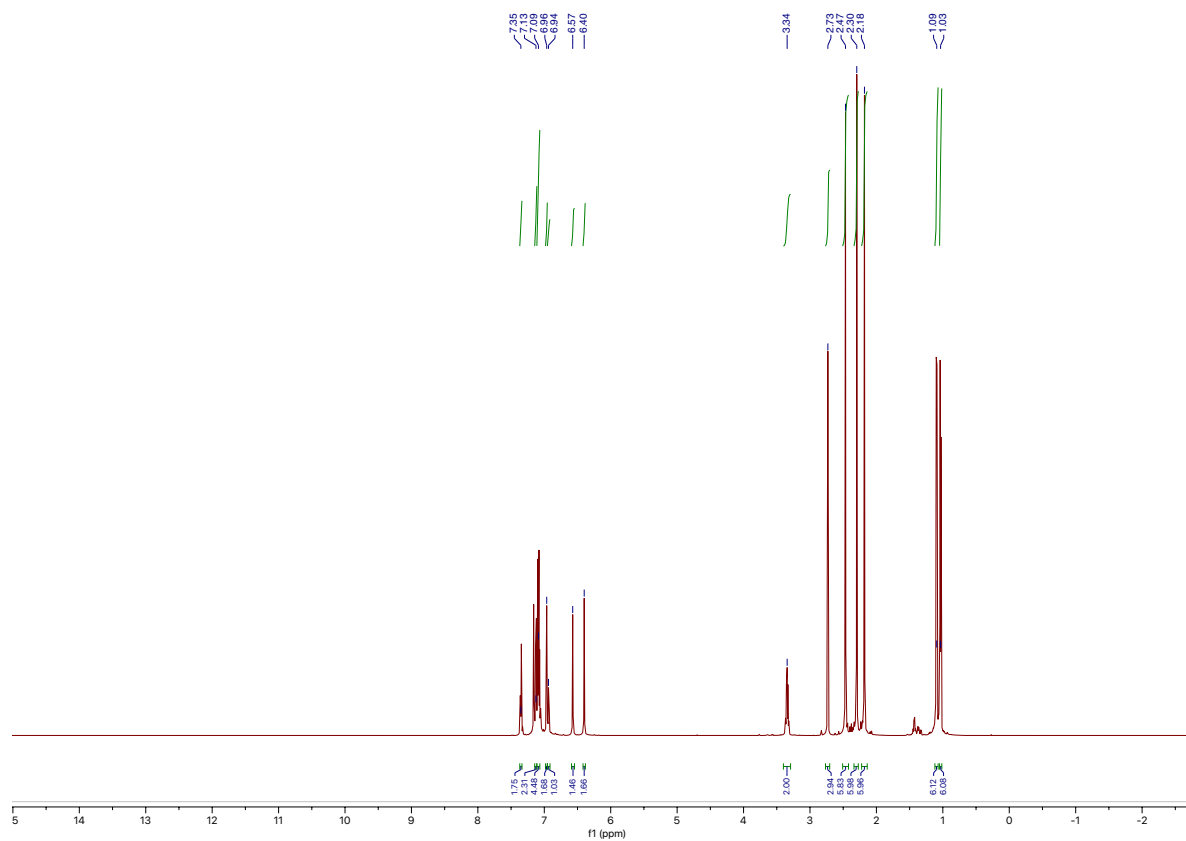

**Figure S26.**  $^1\text{H}$  NMR spectrum of  $\text{Mo}(\text{NAr})(\text{CMePh})(\text{OHMT})(\text{NC}_4\text{H}_4)$  recorded at 600 MHz in  $\text{C}_6\text{D}_6$ .

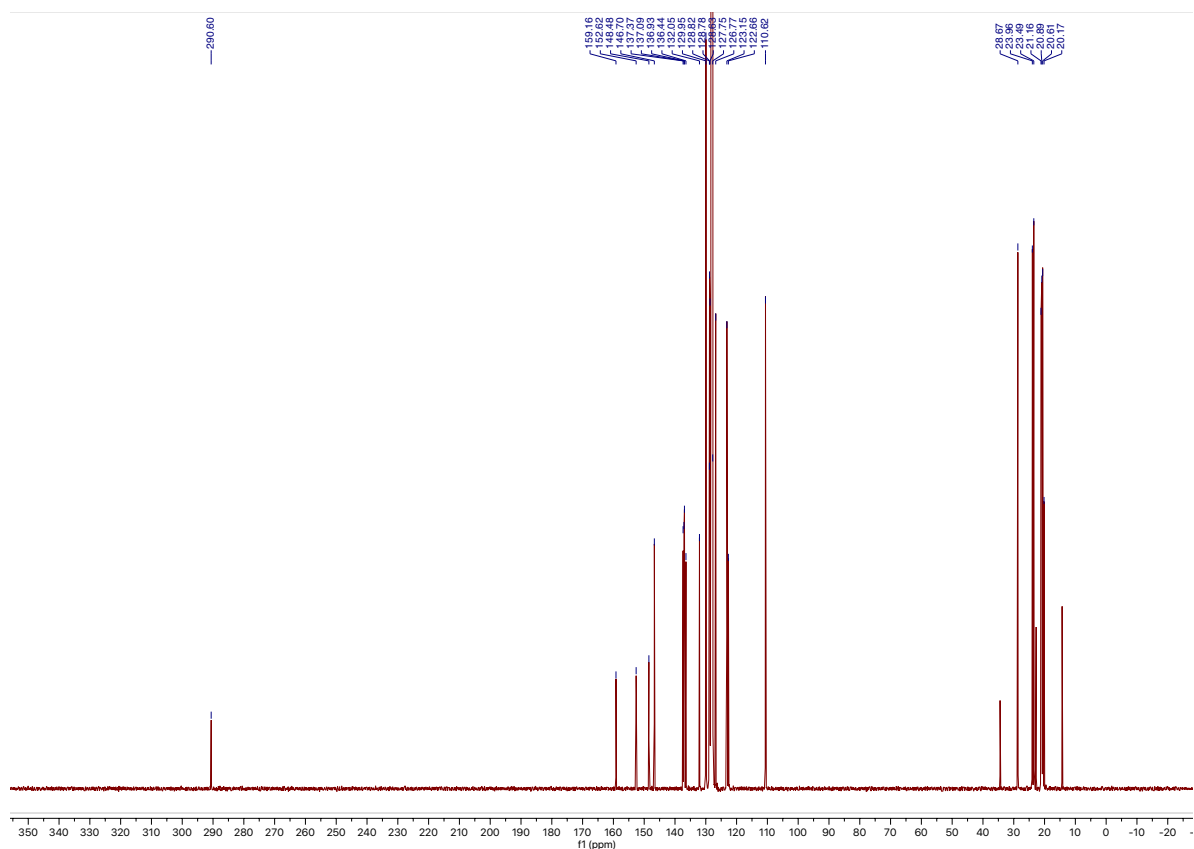

**Figure S27.**  $^{13}\text{C}\{^1\text{H}\}$  NMR spectrum of  $\text{Mo}(\text{NAr})(\text{CMePh})(\text{OHMT})(\text{NC}_4\text{H}_4)$  recorded at 151 MHz in  $\text{C}_6\text{D}_6$ .

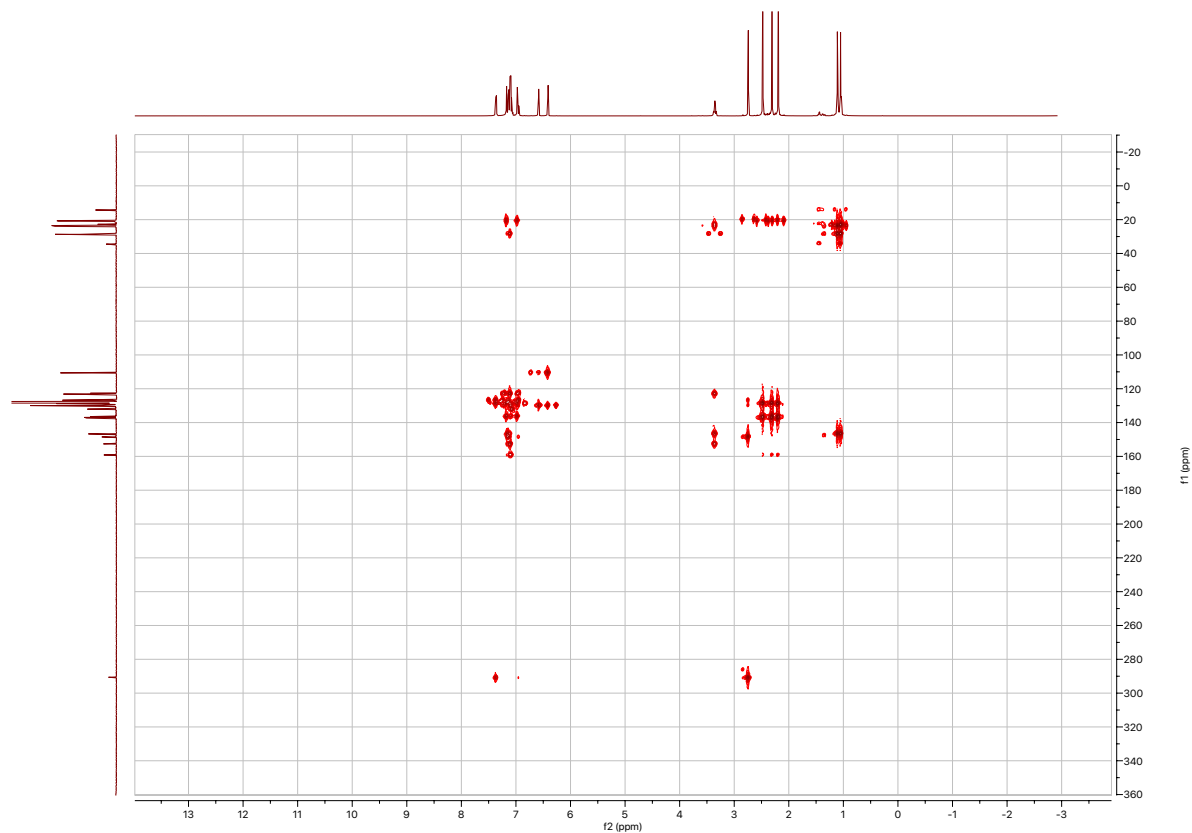

**Figure S28.**  $^{13}\text{C}, ^1\text{H}$ -HMBC NMR spectrum of  $\text{Mo}(\text{NAr})(\text{CMePh})(\text{OHMT})(\text{NC}_4\text{H}_4)$  recorded at 151 MHz in  $\text{C}_6\text{D}_6$ .

## Preliminary studies of reactions of disubstituted alkylidene complexes with olefins.

### Reaction of $2(\text{THF})_x$ with ethylene.

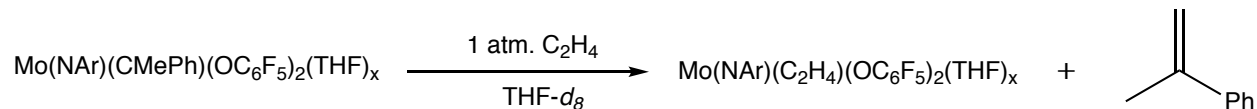

$[\text{Mo}(\text{NAr})(\text{CMePh})(\text{OC}_6\text{F}_5)_2]$  (0.007 g, 0.0094 mmol) was dissolved in  $\text{THF-}d_8$  (0.6 mL) to give an orange solution of  $\text{Mo}(\text{NAr})(\text{CMePh})(\text{OC}_6\text{F}_5)_2(\text{THF})_x$  that was freeze-pump-thawed three times prior to addition of 1 atm of ethylene. After 2 hours, the volatiles were removed from the dark green solution *in vacuo* ( $10^{-2}$  mbar, 10 minutes) prior to dissolving the residue in  $\text{THF-}d_8$  and collecting NMR spectra. Crystallization of what is proposed to be  $\text{Mo}(\text{NAr})(\text{C}_2\text{H}_4)(\text{OC}_6\text{F}_5)_2(\text{THF})_x$  was hindered by its gradual decomposition in the absence of ethylene to unidentified products.  $^1\text{H}$  NMR (600 MHz,  $\text{THF-}d_8$ )  $\delta$  7.1 (dd,  $J = 8.9, 6.2$  Hz, 1H), 7.1 – 7.1 (m, 2H), 3.6 (s, 4H), 2.6 – 2.6 (m, 2H), 2.2 – 2.1 (m, 2H), 1.7 (s, 4H), 1.1 (d,  $J = 6.8$  Hz, 12H).  $^{19}\text{F}\{^1\text{H}\}$  NMR (282 MHz,  $\text{THF-}d_8$ )  $\delta$  –159.9 – –160.4 (m), –168.3 (t,  $J = 21.1$  Hz), –177.5 (ddd,  $J = 29.5, 21.3, 7.2$  Hz).  $^{13}\text{C}\{^1\text{H}\}$  NMR (151 MHz,  $\text{THF-}d_8$ )  $\delta$  153.5, 149.5, 145.4, 143.3, 141.7, 140.7 – 139.6 (m), 138.6 (t,  $J = 13.8$  Hz), 134.0 (t,  $J = 12.6$  Hz), 132.4 (t,  $J = 16.2$  Hz), 129.8, 129.1, 128.6, 126.2, 124.1, 68.4, 64.0, 28.7, 26.5, 24.9.

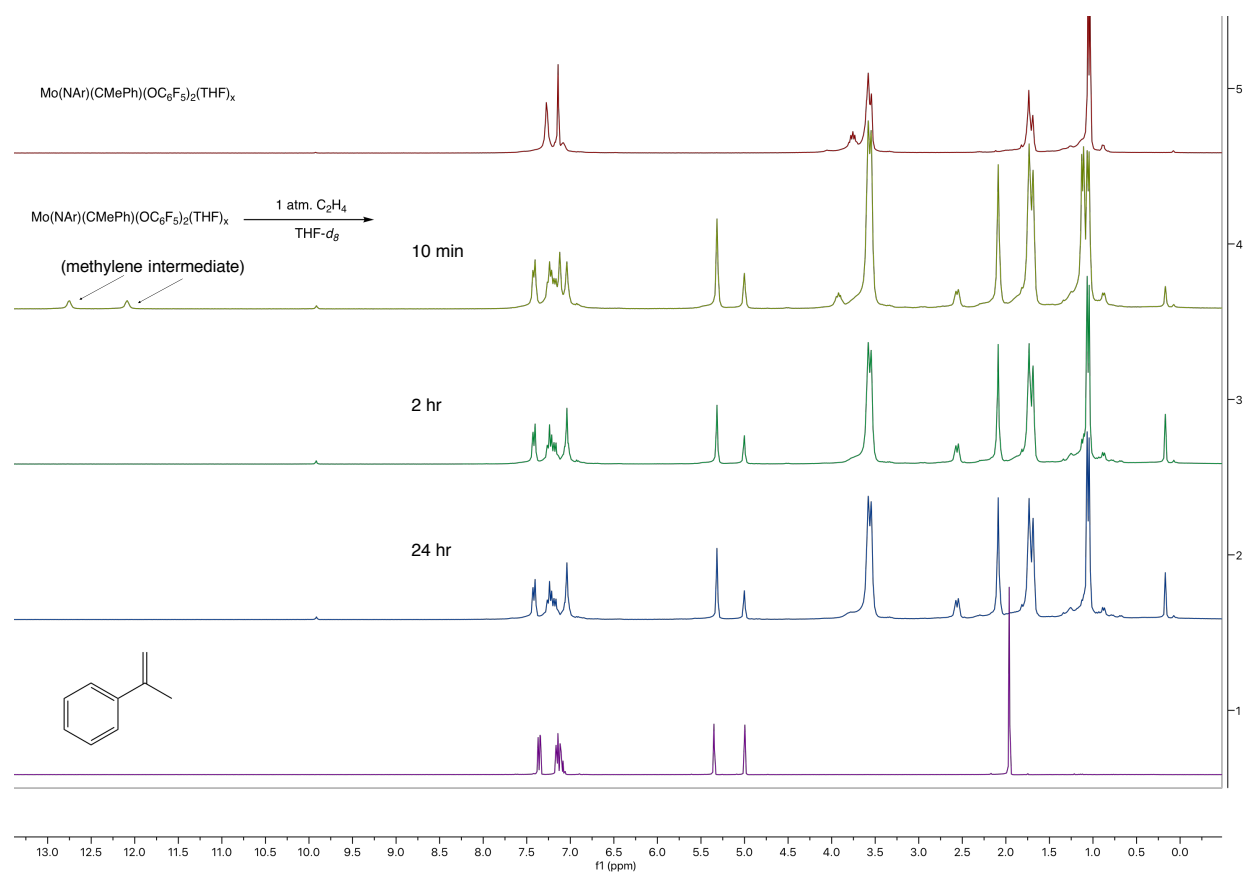

**Figure S29.**  $^1\text{H}$  NMR spectra monitoring the progress of the reaction of  $\text{Mo}(\text{NAr})(\text{CMePh})(\text{OC}_6\text{F}_5)_2(\text{THF})_x$  with 1 atm ethylene. Spectrum 5 is pure  $\text{Mo}(\text{NAr})(\text{CMePh})(\text{OC}_6\text{F}_5)_2(\text{THF})_x$ , spectra 2-4 track the reaction over 24 hours with time of collection inlayed. Spectrum 1 is pure  $\alpha$ -methylstyrene. All spectra were recorded at 300 MHz in  $\text{THF-}d_8$  at 22  $^\circ\text{C}$ .

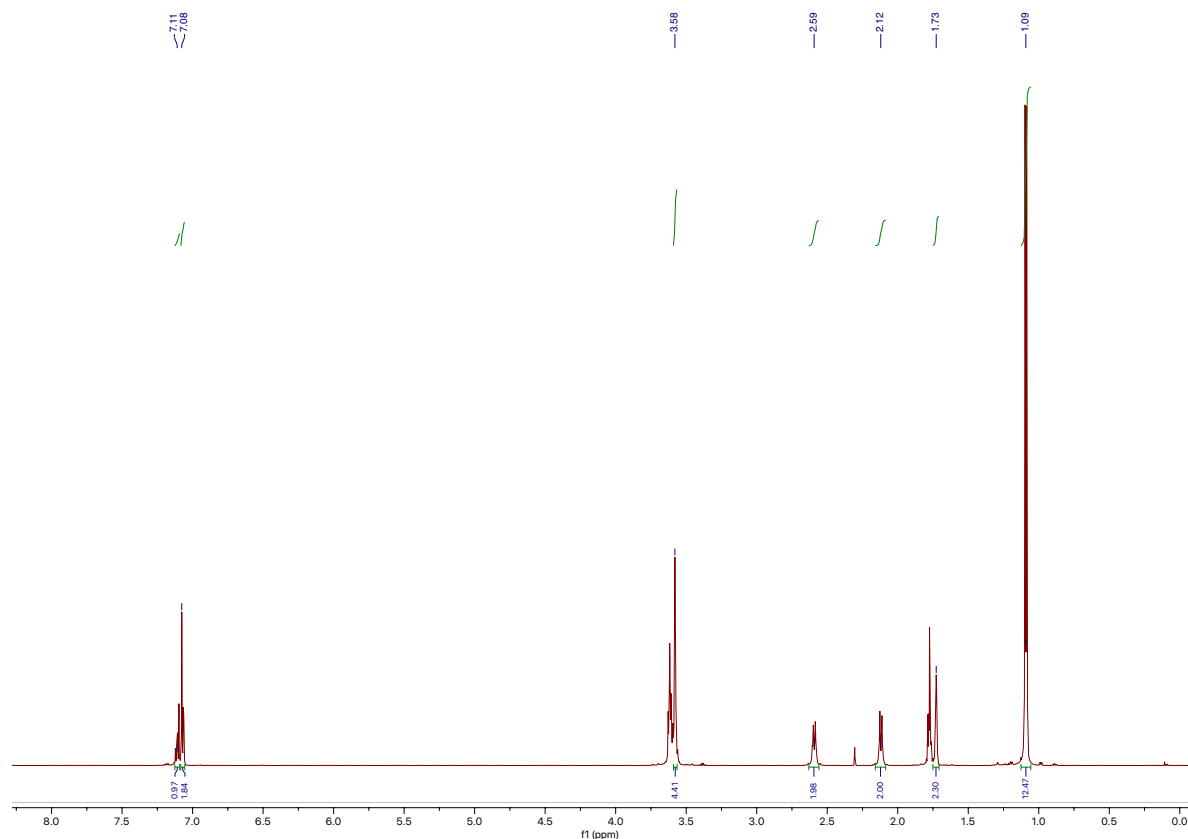

**Figure S30.** <sup>1</sup>H NMR spectrum of Mo(NAr)(C<sub>2</sub>H<sub>4</sub>)(OC<sub>6</sub>F<sub>5</sub>)<sub>2</sub>(THF)<sub>x</sub> recorded at 600 MHz in THF-*d*<sub>8</sub>.

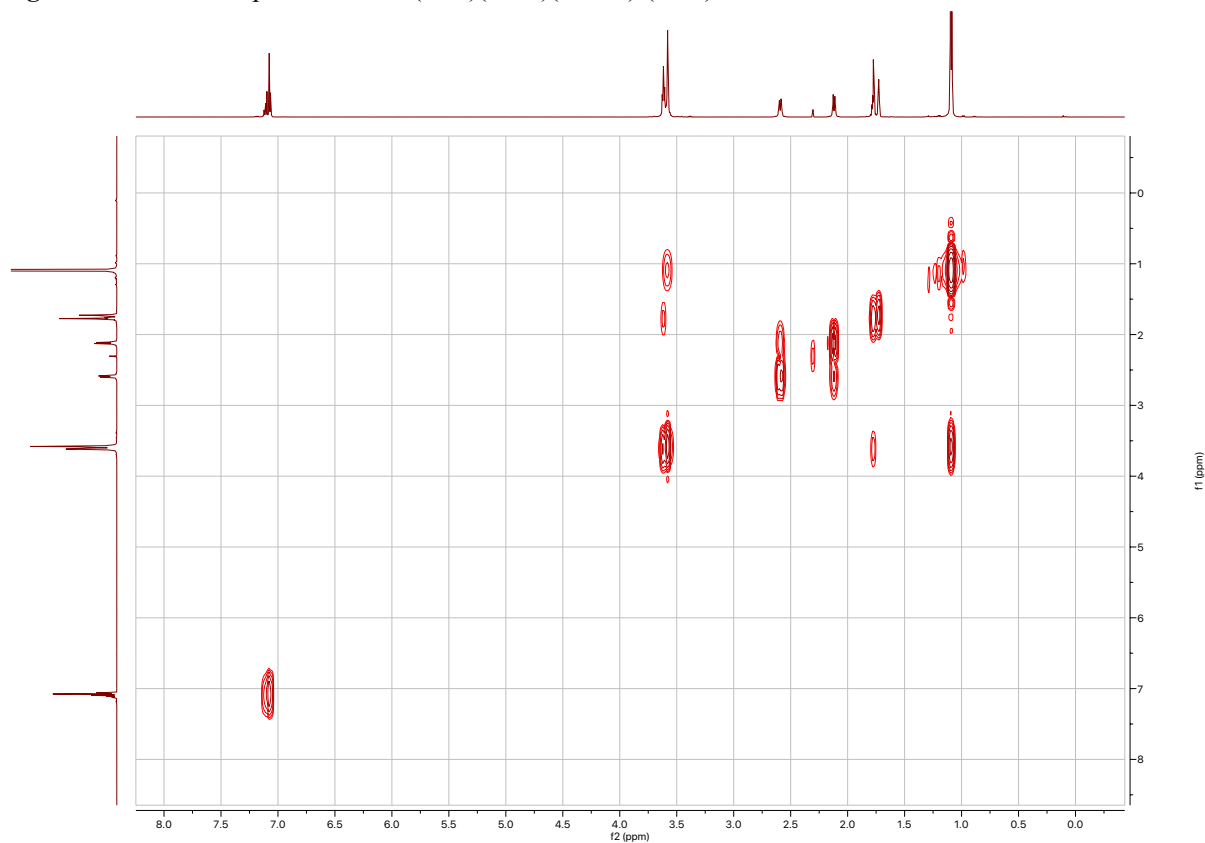

**Figure S31.** <sup>1</sup>H, <sup>1</sup>H-COSY NMR spectrum of Mo(NAr)(C<sub>2</sub>H<sub>4</sub>)(OC<sub>6</sub>F<sub>5</sub>)<sub>2</sub>(THF)<sub>x</sub> recorded at 600 MHz in THF-*d*<sub>8</sub>.

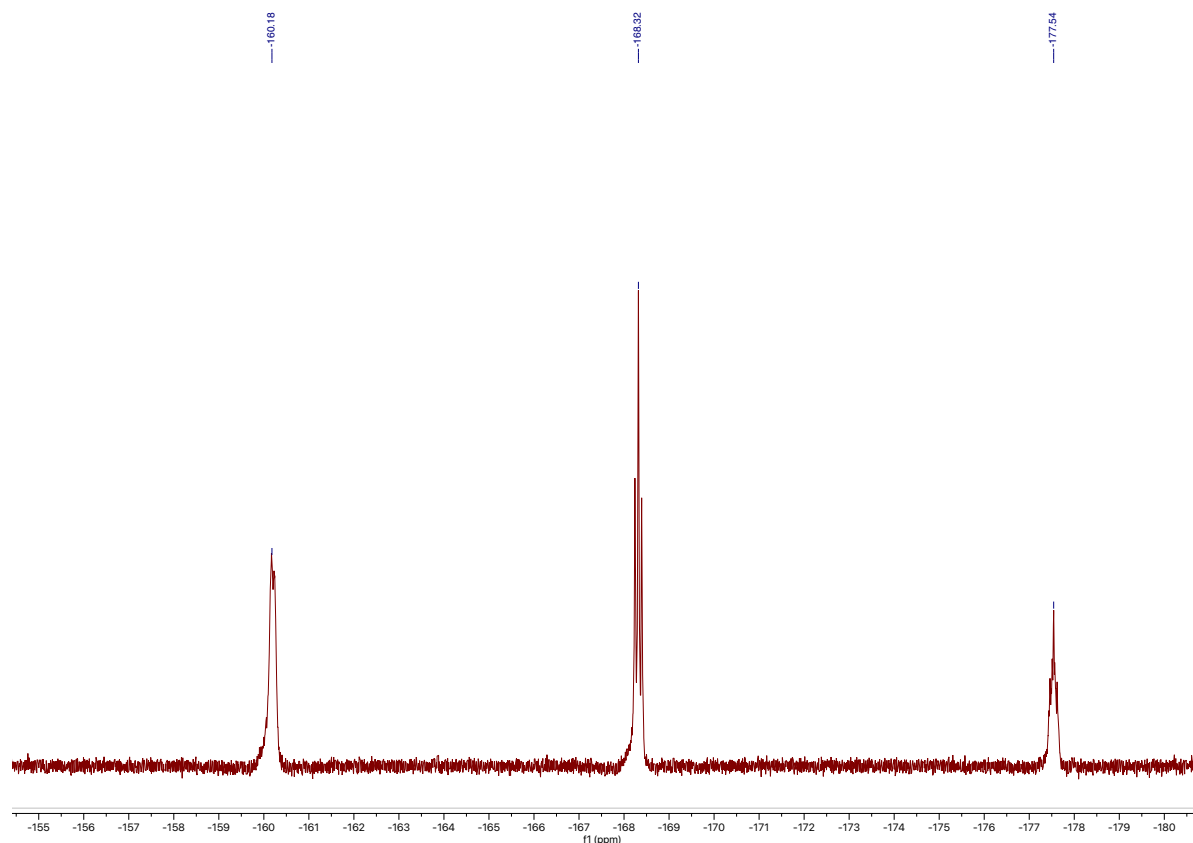

**Figure S32.**  $^{19}\text{F}\{^1\text{H}\}$  NMR spectrum of  $\text{Mo}(\text{NAr})(\text{C}_2\text{H}_4)(\text{OC}_6\text{F}_5)_2(\text{THF})_x$  recorded at 282 MHz in  $\text{THF}-d_8$ .

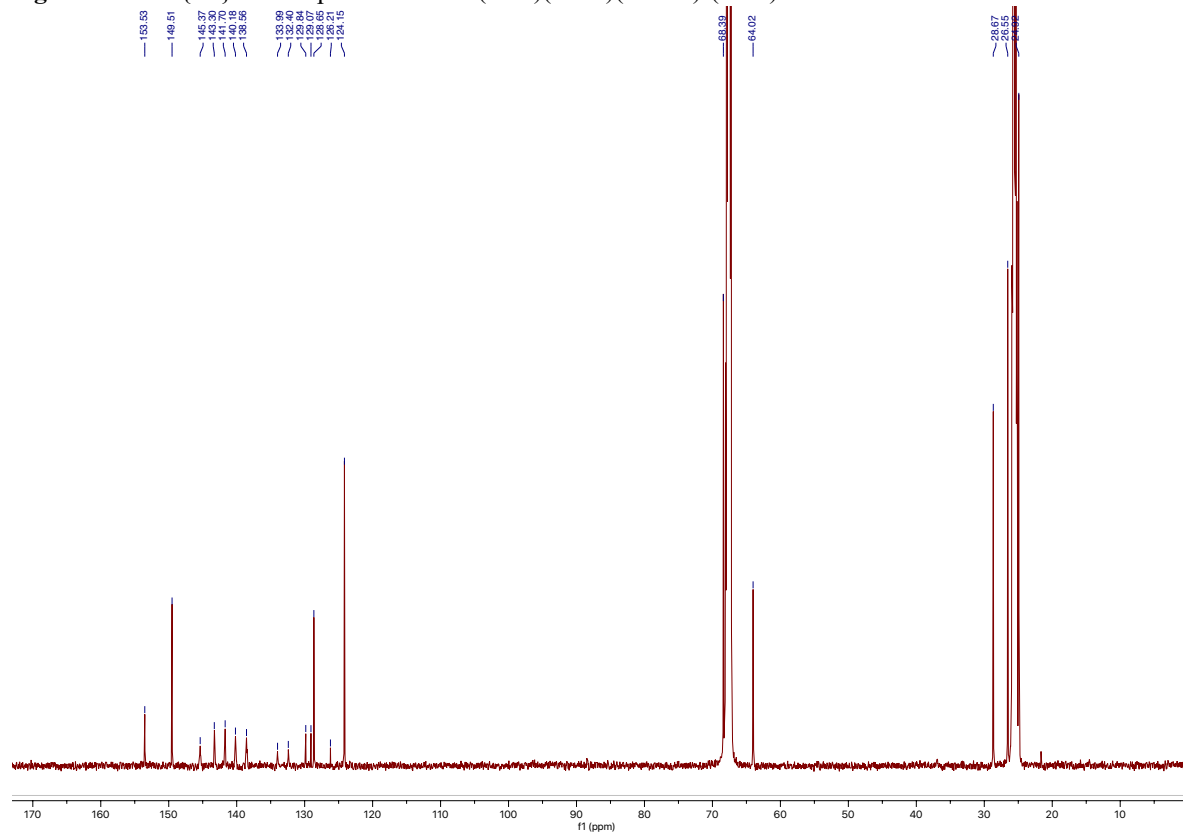

**Figure S33.**  $^{13}\text{C}\{^1\text{H}\}$  NMR spectrum of  $\text{Mo}(\text{NAr})(\text{C}_2\text{H}_4)(\text{OC}_6\text{F}_5)_2(\text{THF})_x$  recorded at 151 MHz in  $\text{THF}-d_8$ .

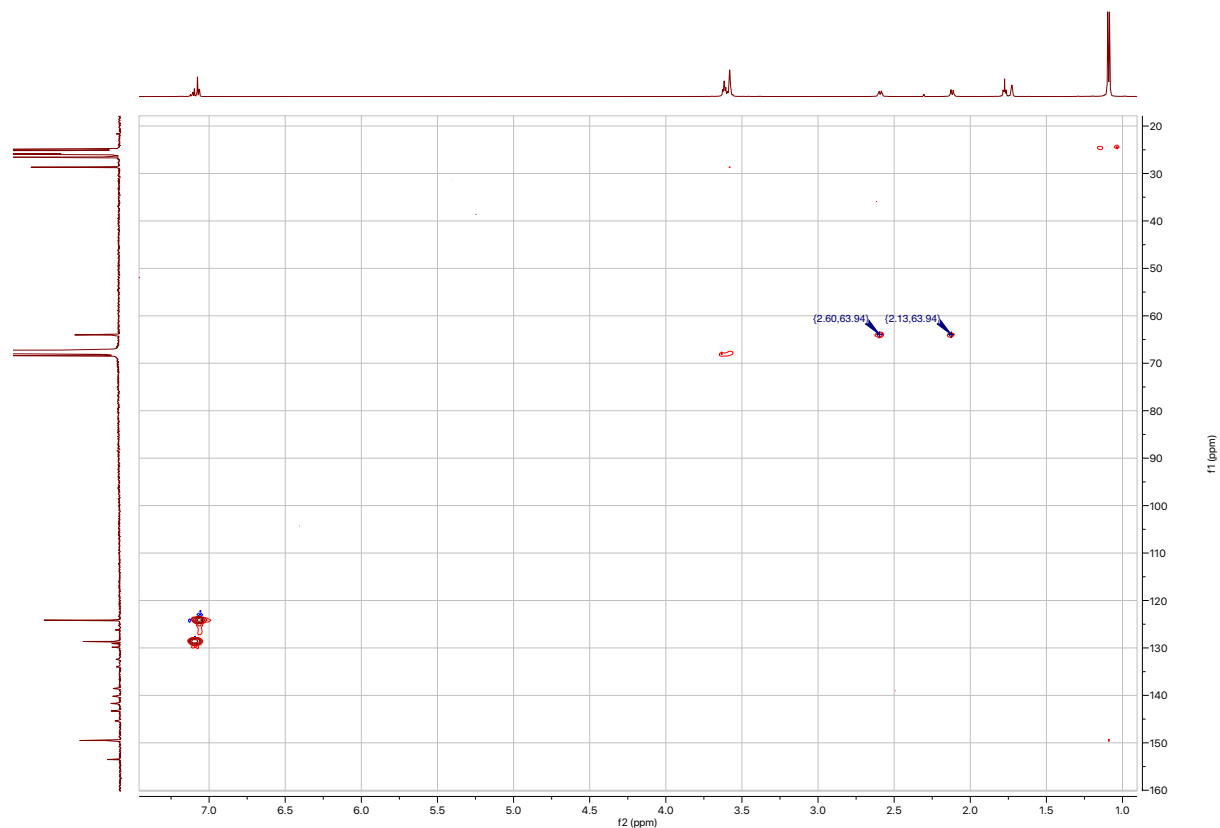

**Figure S34.**  $^{13}\text{C}$ ,  $^1\text{H}$ -HSQC NMR spectrum of  $\text{Mo}(\text{NAr})(\text{C}_2\text{H}_4)(\text{OC}_6\text{F}_5)_2(\text{THF})_x$  recorded at 151 MHz in  $\text{THF}-d_8$ .



## Reaction of 4(MeCN) with ethylene

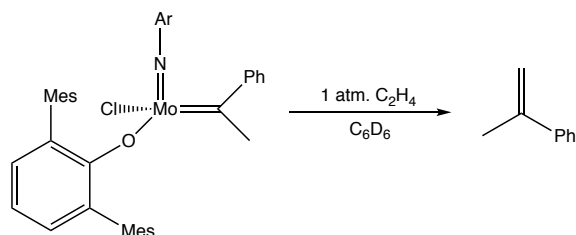

Mo(NAr)(CMePh)(Cl)(OHMT)(MeCN) (0.007 g, 0.0094 mmol) was dissolved in C<sub>6</sub>D<sub>6</sub> (0.6 mL) and the solution was freeze-pump-thawed three times before addition of 1 atm of ethylene.  $\alpha$ -Methylstyrene was observed by <sup>1</sup>H NMR after 10 minutes.

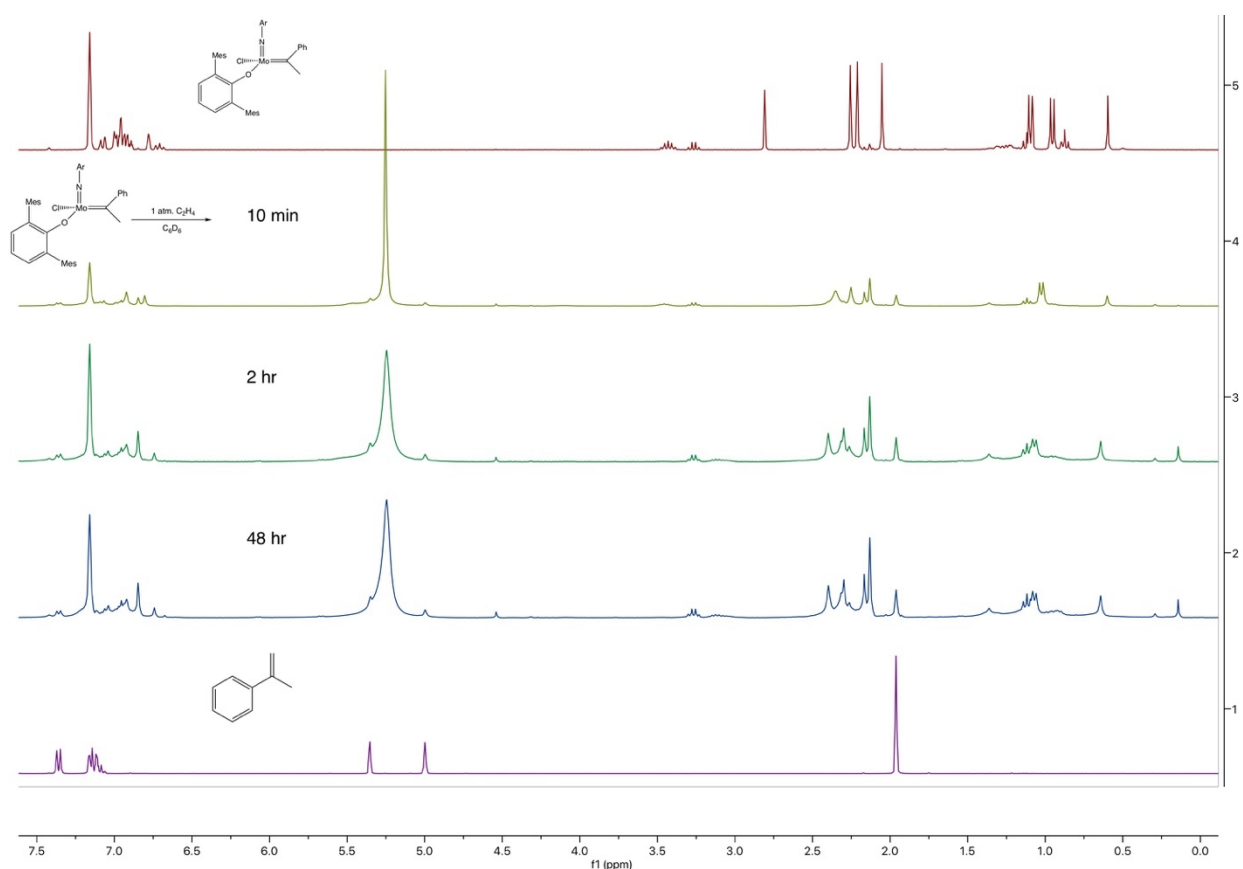

**Figure S35.** <sup>1</sup>H NMR spectra monitoring the progress of the reaction of Mo(NAr)(CMePh)(Cl)(OHMT)(MeCN) with 1 atm of ethylene. Spectrum 5 is pure Mo(NAr)(CMePh)(Cl)(OHMT)(MeCN), spectra 2-4 track the reaction progress over 48 hours. Spectrum 1 is pure  $\alpha$ -methylstyrene. All spectra were recorded at 300 MHz in C<sub>6</sub>D<sub>6</sub> at 22 °C.

## Ring-opening polymerization of cyclooctene

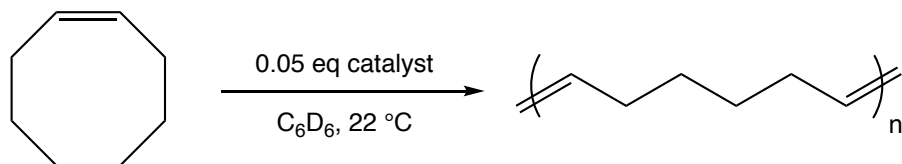

Polymerization with  $\text{Mo}(\text{NAr})(\text{CMePh})(\text{Cl})(\text{OHMT})(\text{MeCN})$  as the initiator. A  $\text{C}_6\text{D}_6$  (0.1 mL) solution of  $\text{Mo}(\text{NAr})(\text{CMePh})(\text{Cl})(\text{OHMT})(\text{MeCN})$  (0.001 g, 0.0014 mmol) in  $\text{C}_6\text{D}_6$  (0.1 mL) was added cyclooctene (2.52  $\mu\text{L}$ , 0.022 mmol) via microsyringe. The reaction was stirred in an open vial at 22 °C. Aliquots were taken periodically that were diluted with  $\text{C}_6\text{D}_6$  (0.5 mL) prior to collecting  $^1\text{H}$  NMR spectra. Conversion was estimated by integration of the olefin proton resonance of cyclooctene (m, 5.69-5.61 ppm) and polycyclooctene (m, 5.51-5.45 ppm).

Polymerization with  $\text{Mo}(\text{NAr})(\text{CMePh})(\text{OC}_6\text{F}_5)_2(\text{THF})_x$  as the initiator.  $[\text{Mo}(\text{NAr})(\text{CMePh})(\text{OC}_6\text{F}_5)_2]_2$  (0.001 g, 0.0013 mmol) was dissolved in  $\text{THF-}d_8$  (100  $\mu\text{L}$ ) and diluted with  $\text{C}_6\text{D}_6$  (900  $\mu\text{L}$ ) prior to adding cyclooctene (2.39  $\mu\text{L}$ , 0.026 mmol) via microsyringe. The reaction was stirred in an open vial at 22 °C. Aliquots were taken periodically that were diluted with  $\text{C}_6\text{D}_6$  (0.5 mL) prior to collecting  $^1\text{H}$  NMR spectra. Conversion was estimated by integration of the olefin proton resonance of cyclooctene (m, 5.69-5.61 ppm) and polycyclooctene (m, 5.51-5.45 ppm).

**Table S1.** Conversion of cyclooctene to polycyclooctene.

| Initiator/Conversion (%)                                                     | 20 minutes | 2 hours |
|------------------------------------------------------------------------------|------------|---------|
| $\text{Mo}(\text{NAr})(\text{CMePh})(\text{Cl})(\text{OHMT})(\text{MeCN})$   | >99        | >99     |
| $\text{Mo}(\text{NAr})(\text{CMePh})(\text{OC}_6\text{F}_5)_2(\text{THF})_x$ | 97         | >99     |

## Homocoupling of 1-decene

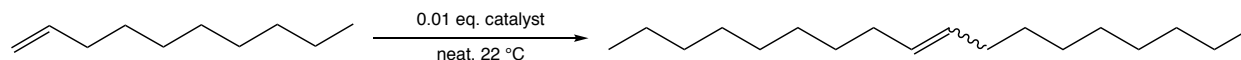

Homocoupling with  $\text{Mo}(\text{NAr})(\text{CMePh})(\text{Cl})(\text{OHMT})(\text{MeCN})$  as the initiator. 1-Decene (118  $\mu\text{L}$ , 0.60 mmol) was added via microsyringe to  $\text{Mo}(\text{NAr})(\text{CMePh})(\text{Cl})(\text{OHMT})(\text{MeCN})$  (0.005 g, 0.006 mmol) at 22 °C. The reaction was stirred in an open vial. Aliquots were removed periodically and diluted with 0.5 mL  $\text{CDCl}_3$  prior to collecting  $^1\text{H}$  NMR spectra. Conversion was estimated by integration of the olefin proton resonance of 1-decene (m, 5.86-5.78) and 9-octadecene (m, 5.39-5.32). The Z/E ratio was estimated by integration of the olefin proton resonance of E-9-octadecene (m, 5.39-5.37) and Z-9-octadecene (m, 5.37-5.32).

Homocoupling with  $\text{Mo}(\text{NAr})(\text{CMePh})(\text{OC}_6\text{F}_5)_2(\text{THF})_x$  as the initiator.  $[\text{Mo}(\text{NAr})(\text{CMePh})(\text{OC}_6\text{F}_5)_2]_2$  (0.005 g, 0.007 mmol) was dissolved in  $\text{THF-}d_8$  (100  $\mu\text{L}$ ) prior to adding 1-decene (133  $\mu\text{L}$ , 0.70 mmol) via microsyringe. The reaction was stirred in an open vial. Aliquots were removed periodically and diluted with 0.5 mL  $\text{CDCl}_3$  prior to collecting  $^1\text{H}$  NMR spectra. Conversion was estimated by integration of the olefin proton resonance of 1-decene (m, 5.86-5.78) and 9-octadecene (m, 5.39-5.32). The Z/E ratio was estimated by integration of the olefin proton resonance of E-9-octadecene (m, 5.39-5.37) and Z-9-octadecene (m, 5.37-5.32).

**Table S2.** Conversion of 1-decene to 9-octadecene and Z/E ratio of the product.

| Initiator/Conversion, %                                                      | 20 minutes | 2 hours | 24 hours | Final Z/E |
|------------------------------------------------------------------------------|------------|---------|----------|-----------|
| $\text{Mo}(\text{NAr})(\text{CMePh})(\text{Cl})(\text{OHMT})(\text{MeCN})$   | 86         | 91      | 91       | 37/63     |
| $\text{Mo}(\text{NAr})(\text{CMePh})(\text{OC}_6\text{F}_5)_2(\text{THF})_x$ | 32         | 48      | >99      | 23/77     |

## X-Ray Crystallography

**General Considerations.** Diffraction data were collected on a Bruker-AXS Apex II diffractometer with an Apex II CCD detector using Mo  $K\alpha$  radiation ( $\lambda = 0.71073$  Å) from a fine-focus sealed tube source. Data were collected at 100 K by performing  $0.5^\circ$   $\omega$ -scans, integrated using SAINT<sup>1</sup>, and absorption corrected using SADABS<sup>2</sup>. The structure was solved by direct methods using SHELXT<sup>3</sup> and refined against  $F^2$  on all data by full-matrix least squares with SHELXL-2018/3<sup>4</sup> following established refinement strategies.<sup>5</sup> All non-hydrogen atoms were refined anisotropically. All hydrogen atoms were included into the model at geometrically calculated positions and refined using a riding model. The isotropic displacement parameters of all hydrogen atoms were fixed to 1.2 times the  $U$  value of the atoms they are linked to (1.5 times for methyl groups). Crystal and data quality details, as well as a summary of the residual refinement values, are listed in the accompanying table.

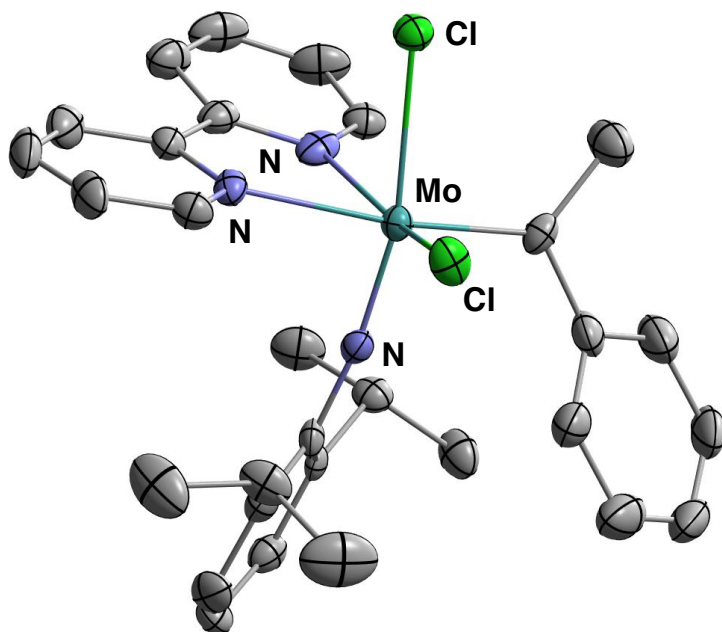

**Figure S36.** Thermal ellipsoid plot (50%) of Mo(NAr)(CMePh)(Cl)<sub>2</sub>(bipy). Unlabeled gray ellipsoids correspond to carbon. Solvent molecules and hydrogen atoms have been omitted for clarity.

**Table S3.** Crystal data and structure refinement for Mo(NAr)(CMePh)(OMes)<sub>2</sub> (**1**).

|                                         |                                                              |                             |
|-----------------------------------------|--------------------------------------------------------------|-----------------------------|
| Identification code                     | rrs8jt                                                       |                             |
| Empirical formula                       | C <sub>38</sub> H <sub>47</sub> MoNO <sub>2</sub>            |                             |
| Formula weight                          | 645.70 g/mol                                                 |                             |
| Temperature                             | 100(2) K                                                     |                             |
| Wavelength                              | 0.71073 Å                                                    |                             |
| Crystal system                          | Monoclinic                                                   |                             |
| Space group                             | P2 <sub>1</sub> /c                                           |                             |
| Unit cell dimensions                    | $a = 17.3459(4)$ Å                                           | $\alpha = 90^\circ$         |
|                                         | $b = 10.2404(3)$ Å                                           | $\beta = 91.4203(11)^\circ$ |
|                                         | $c = 18.9524(5)$ Å                                           | $\gamma = 90^\circ$         |
| Volume                                  | 3365.46(15) Å <sup>3</sup>                                   |                             |
| Z                                       | 4                                                            |                             |
| Density (calculated)                    | 1.274 mg/m <sup>3</sup>                                      |                             |
| Absorption coefficient                  | 0.422 mm <sup>-1</sup>                                       |                             |
| $F(000)$                                | 1360                                                         |                             |
| Crystal size                            | 0.295 x 0.290 x 0.092 mm <sup>3</sup>                        |                             |
| $\theta$ range for data collection      | 2.150 to 30.996°                                             |                             |
| Index ranges                            | $-25 \leq h \leq 25, -14 \leq k \leq 14, -27 \leq l \leq 27$ |                             |
| Reflections collected                   | 108793                                                       |                             |
| Independent reflections                 | 10720 [ $R_{\text{int}} = 0.0364$ ]                          |                             |
| Completeness to $\theta = 25.242^\circ$ | 100.0 %                                                      |                             |
| Absorption correction                   | Semi-empirical from equivalents                              |                             |
| Refinement method                       | Full-matrix least-squares on $F^2$                           |                             |
| Data / restraints / parameters          | 10720 / 0 / 390                                              |                             |
| Goodness-of-fit on $F^2$                | 1.031                                                        |                             |
| Final $R$ indices [ $I > 2\sigma_1$ ]   | $R_1 = 0.0248, wR_2 = 0.0613$                                |                             |
| $R$ indices (all data, 0.69 Å)          | $R_1 = 0.0309, wR_2 = 0.0648$                                |                             |
| Largest diff. peak and hole             | 0.530 and $-0.459$ e/Å <sup>3</sup>                          |                             |

**Table S4.** Crystal data and structure refinement for Mo(NAr)(CMePh)(OC<sub>6</sub>F<sub>5</sub>)<sub>2</sub>(MeCN) (2(MeCN)).

|                                         |                                                                                 |                             |
|-----------------------------------------|---------------------------------------------------------------------------------|-----------------------------|
| Identification code                     | rrs17jt                                                                         |                             |
| Empirical formula                       | C <sub>39</sub> H <sub>40</sub> F <sub>10</sub> MoN <sub>2</sub> O <sub>2</sub> |                             |
| Formula weight                          | 854.67 g/mol                                                                    |                             |
| Temperature                             | 100(2) K                                                                        |                             |
| Wavelength                              | 0.71073 Å                                                                       |                             |
| Crystal system                          | Monoclinic                                                                      |                             |
| Space group                             | P2 <sub>1</sub> /n                                                              |                             |
| Unit cell dimensions                    | $a = 10.2161(3)$ Å                                                              | $\alpha = 90^\circ$         |
|                                         | $b = 18.5134(5)$ Å                                                              | $\beta = 99.2977(12)^\circ$ |
|                                         | $c = 20.5418(5)$ Å                                                              | $\gamma = 90^\circ$         |
| Volume                                  | 3834.12(18) Å <sup>3</sup>                                                      |                             |
| Z                                       | 4                                                                               |                             |
| Density (calculated)                    | 1.481 mg/m <sup>3</sup>                                                         |                             |
| Absorption coefficient                  | 0.427 mm <sup>-1</sup>                                                          |                             |
| $F(000)$                                | 1744                                                                            |                             |
| Crystal size                            | 0.339 x 0.157 x 0.120 mm <sup>3</sup>                                           |                             |
| $\theta$ range for data collection      | 2.009 to 27.876°                                                                |                             |
| Index ranges                            | $-13 \leq h \leq 13, -24 \leq k \leq 24, -27 \leq l \leq 27$                    |                             |
| Reflections collected                   | 127521                                                                          |                             |
| Independent reflections                 | 9151 [ $R_{\text{int}} = 0.0551$ ]                                              |                             |
| Completeness to $\theta = 25.242^\circ$ | 100.0 %                                                                         |                             |
| Absorption correction                   | Semi-empirical from equivalents                                                 |                             |
| Refinement method                       | Full-matrix least-squares on $F^2$                                              |                             |
| Data / restraints / parameters          | 9151 / 1660 / 799                                                               |                             |
| Goodness-of-fit on $F^2$                | 1.307                                                                           |                             |
| Final $R$ indices [ $I > 2\sigma_1$ ]   | $R_1 = 0.0575, wR_2 = 0.1237$                                                   |                             |
| $R$ indices (all data, 0.76 Å)          | $R_1 = 0.0658, wR_2 = 0.1271$                                                   |                             |
| Largest diff. peak and hole             | 0.919 and $-1.396$ e/Å <sup>3</sup>                                             |                             |

**Note:** Compound rrs17jt crystallizes in the monoclinic centrosymmetric space group P2<sub>1</sub>/n with one molecule of rrs17jt and one molecule of pentane per asymmetric unit.

Both perfluorophenoxide ligands as well as the alkylidene ligand and the pentane solvent molecule each exhibited disorder that was modeled over two positions; all disorder ratios were refined freely, and the correlated disorder of the alkylidene ligand and one perfluorophenoxide ligand were refined on the same free variable. All disorders were refined with the help of similarity restraints on 1,2- and 1,3- distances as well as similarity and rigid bond restraints for anisotropic displacement parameters. Flatness restraints were used on two minor-component phenyl rings, isotropic approximation restraints were applied to the anisotropic displacement parameters of two poorly-behaved carbon atoms within the disordered pentane molecule, and the anisotropic displacement parameters of two nearly-overlapping positions of a disordered phenoxide oxygen were constrained to be equivalent.

**Table S5.** Crystal data and structure refinement for Mo(NAr)(CMePh)(OC<sub>6</sub>F<sub>5</sub>)<sub>2</sub>(bipy) (**2**(bipy)).

|                                         |                                                                                 |                              |
|-----------------------------------------|---------------------------------------------------------------------------------|------------------------------|
| Identification code                     | rrs12jt_sq                                                                      |                              |
| Empirical formula                       | C <sub>42</sub> H <sub>33</sub> F <sub>10</sub> MoN <sub>3</sub> O <sub>2</sub> |                              |
| Formula weight                          | 897.65 g/mol                                                                    |                              |
| Temperature                             | 100(2) K                                                                        |                              |
| Wavelength                              | 0.71073 Å                                                                       |                              |
| Crystal system                          | Triclinic                                                                       |                              |
| Space group                             | P $\bar{1}$                                                                     |                              |
| Unit cell dimensions                    | $a = 12.6221(4)$ Å                                                              | $\alpha = 72.5631(13)^\circ$ |
|                                         | $b = 18.1804(5)$ Å                                                              | $\beta = 82.1978(13)^\circ$  |
|                                         | $c = 19.4797(5)$ Å                                                              | $\gamma = 74.6797(13)^\circ$ |
| Volume                                  | 4105.4(2) Å <sup>3</sup>                                                        |                              |
| Z                                       | 4                                                                               |                              |
| Density (calculated)                    | 1.452 mg/m <sup>3</sup>                                                         |                              |
| Absorption coefficient                  | 0.404 mm <sup>-1</sup>                                                          |                              |
| $F(000)$                                | 1816                                                                            |                              |
| Crystal size                            | 0.329 x 0.122 x 0.062 mm <sup>3</sup>                                           |                              |
| $\theta$ range for data collection      | 1.098 to 29.130°                                                                |                              |
| Index ranges                            | $-17 \leq h \leq 17, -24 \leq k \leq 24, -26 \leq l \leq 26$                    |                              |
| Reflections collected                   | 151607                                                                          |                              |
| Independent reflections                 | 22083 [ $R_{\text{int}} = 0.0515$ ]                                             |                              |
| Completeness to $\theta = 25.242^\circ$ | 100.0 %                                                                         |                              |
| Absorption correction                   | Semi-empirical from equivalents                                                 |                              |
| Refinement method                       | Full-matrix least-squares on $F^2$                                              |                              |
| Data / restraints / parameters          | 22083 / 0 / 1055                                                                |                              |
| Goodness-of-fit on $F^2$                | 1.019                                                                           |                              |
| Final $R$ indices [ $I > 2\sigma_1$ ]   | $R1 = 0.0300, wR2 = 0.0678$                                                     |                              |
| $R$ indices (all data, 0.73 Å)          | $R1 = 0.0479, wR2 = 0.0757$                                                     |                              |
| Largest diff. peak and hole             | 0.571 and $-0.523$ e/Å <sup>3</sup>                                             |                              |

**Table S6.** Crystal data and structure refinement for Mo(NAr)(CMePh)(Cl)<sub>2</sub>(bipy) (**3**(bipy)).

|                                         |                                                                                |                     |
|-----------------------------------------|--------------------------------------------------------------------------------|---------------------|
| Identification code                     | rrs11jt                                                                        |                     |
| Empirical formula                       | C <sub>67</sub> H <sub>74</sub> Cl <sub>4</sub> Mo <sub>2</sub> N <sub>6</sub> |                     |
| Formula weight                          | 1297.00 g/mol                                                                  |                     |
| Temperature                             | 100(2) K                                                                       |                     |
| Wavelength                              | 0.71073 Å                                                                      |                     |
| Crystal system                          | Orthorhombic                                                                   |                     |
| Space group                             | Fdd2                                                                           |                     |
| Unit cell dimensions                    | $a = 31.8856(12)$ Å                                                            | $\alpha = 90^\circ$ |
|                                         | $b = 37.8599(14)$ Å                                                            | $\beta = 90^\circ$  |
|                                         | $c = 10.3398(4)$ Å                                                             | $\gamma = 90^\circ$ |
| Volume                                  | 12482.1(8) Å <sup>3</sup>                                                      |                     |
| Z                                       | 8                                                                              |                     |
| Density (calculated)                    | 1.380 mg/m <sup>3</sup>                                                        |                     |
| Absorption coefficient                  | 0.618 mm <sup>-1</sup>                                                         |                     |
| $F(000)$                                | 5360                                                                           |                     |
| Crystal size                            | 0.335 x 0.028 x 0.020 mm <sup>3</sup>                                          |                     |
| $\theta$ range for data collection      | 1.670 to 28.278°                                                               |                     |
| Index ranges                            | $-42 \leq h \leq 28, -50 \leq k \leq 49, -12 \leq l \leq 13$                   |                     |
| Reflections collected                   | 30976                                                                          |                     |
| Independent reflections                 | 7306 [ $R_{\text{int}} = 0.0793$ ]                                             |                     |
| Completeness to $\theta = 25.242^\circ$ | 100.0 %                                                                        |                     |
| Absorption correction                   | Semi-empirical from equivalents                                                |                     |
| Refinement method                       | Full-matrix least-squares on $F^2$                                             |                     |
| Data / restraints / parameters          | 7306 / 325 / 433                                                               |                     |
| Goodness-of-fit on $F^2$                | 1.020                                                                          |                     |
| Final $R$ indices [ $I > 2\sigma_1$ ]   | $R_1 = 0.0516, wR_2 = 0.0943$                                                  |                     |
| $R$ indices (all data, 0.75 Å)          | $R_1 = 0.0804, wR_2 = 0.1044$                                                  |                     |
| Absolute structure parameter            | -0.05(3)                                                                       |                     |
| Largest diff. peak and hole             | 0.692 and -0.758 e/Å <sup>3</sup>                                              |                     |



**Table S7.** Crystal data and structure refinement for Mo(NAr)(CMePh)(Cl)(OHMT)(MeCN) (4(MeCN)).

|                                         |                                                              |                             |
|-----------------------------------------|--------------------------------------------------------------|-----------------------------|
| Identification code                     | rrs15jt                                                      |                             |
| Empirical formula                       | C <sub>51.50</sub> H <sub>60</sub> ClMoN <sub>3</sub> O      |                             |
| Formula weight                          | 868.41 g/mol                                                 |                             |
| Temperature                             | 100(2) K                                                     |                             |
| Wavelength                              | 0.71073 Å                                                    |                             |
| Crystal system                          | Monoclinic                                                   |                             |
| Space group                             | P2 <sub>1</sub> /n                                           |                             |
| Unit cell dimensions                    | $a = 8.8880(2)$ Å                                            | $\alpha = 90^\circ$         |
|                                         | $b = 17.1281(4)$ Å                                           | $\beta = 97.9340(12)^\circ$ |
|                                         | $c = 30.3238(7)$ Å                                           | $\gamma = 90^\circ$         |
| Volume                                  | 4572.14(18) Å <sup>3</sup>                                   |                             |
| Z                                       | 4                                                            |                             |
| Density (calculated)                    | 1.262 mg/m <sup>3</sup>                                      |                             |
| Absorption coefficient                  | 0.385 mm <sup>-1</sup>                                       |                             |
| $F(000)$                                | 1828                                                         |                             |
| Crystal size                            | 0.205 x 0.135 x 0.130 mm <sup>3</sup>                        |                             |
| $\theta$ range for data collection      | 1.803 to 29.130°                                             |                             |
| Index ranges                            | $-12 \leq h \leq 12, -23 \leq k \leq 23, -41 \leq l \leq 41$ |                             |
| Reflections collected                   | 114788                                                       |                             |
| Independent reflections                 | 12310 [ $R_{\text{int}} = 0.0851$ ]                          |                             |
| Completeness to $\theta = 25.242^\circ$ | 100.0 %                                                      |                             |
| Absorption correction                   | Semi-empirical from equivalents                              |                             |
| Refinement method                       | Full-matrix least-squares on $F^2$                           |                             |
| Data / restraints / parameters          | 12310 / 415 / 603                                            |                             |
| Goodness-of-fit on $F^2$                | 1.025                                                        |                             |
| Final $R$ indices [ $I > 2\sigma_1$ ]   | $R_1 = 0.0405, wR_2 = 0.0923$                                |                             |
| $R$ indices (all data, 0.73 Å)          | $R_1 = 0.0593, wR_2 = 0.1010$                                |                             |
| Largest diff. peak and hole             | 0.487 and -0.802 e/Å <sup>3</sup>                            |                             |

**Table S8.** Crystal data and structure refinement for Mo(NAr)(CMePh)(OHMT)(NC<sub>4</sub>H<sub>4</sub>) (**5**).

|                                         |                                                              |                             |
|-----------------------------------------|--------------------------------------------------------------|-----------------------------|
| Identification code                     | rrs16jt                                                      |                             |
| Empirical formula                       | C <sub>48</sub> H <sub>54</sub> MoN <sub>2</sub> O           |                             |
| Formula weight                          | 770.87 g/mol                                                 |                             |
| Temperature                             | 100(2) K                                                     |                             |
| Wavelength                              | 0.71073 Å                                                    |                             |
| Crystal system                          | Monoclinic                                                   |                             |
| Space group                             | P2 <sub>1</sub> /n                                           |                             |
| Unit cell dimensions                    | $a = 9.0923(2)$ Å                                            | $\alpha = 90^\circ$         |
|                                         | $b = 20.8485(6)$ Å                                           | $\beta = 96.8195(13)^\circ$ |
|                                         | $c = 21.7949(6)$ Å                                           | $\gamma = 90^\circ$         |
| Volume                                  | 4102.23(19) Å <sup>3</sup>                                   |                             |
| Z                                       | 4                                                            |                             |
| Density (calculated)                    | 1.248 mg/m <sup>3</sup>                                      |                             |
| Absorption coefficient                  | 0.357 mm <sup>-1</sup>                                       |                             |
| $F(000)$                                | 1624                                                         |                             |
| Crystal size                            | 0.199 x 0.140 x 0.040 mm <sup>3</sup>                        |                             |
| $\theta$ range for data collection      | 1.882 to 26.372°                                             |                             |
| Index ranges                            | $-11 \leq h \leq 11, -26 \leq k \leq 26, -27 \leq l \leq 27$ |                             |
| Reflections collected                   | 53660                                                        |                             |
| Independent reflections                 | 8406 [ $R_{\text{int}} = 0.0830$ ]                           |                             |
| Completeness to $\theta = 25.242^\circ$ | 100.0 %                                                      |                             |
| Absorption correction                   | Semi-empirical from equivalents                              |                             |
| Refinement method                       | Full-matrix least-squares on $F^2$                           |                             |
| Data / restraints / parameters          | 8406 / 0 / 480                                               |                             |
| Goodness-of-fit on $F^2$                | 1.022                                                        |                             |
| Final $R$ indices [ $I > 2\sigma_1$ ]   | $R_1 = 0.0375, wR_2 = 0.0785$                                |                             |
| $R$ indices (all data, 0.80 Å)          | $R_1 = 0.0594, wR_2 = 0.0880$                                |                             |
| Largest diff. peak and hole             | 0.458 and $-0.423$ e/Å <sup>3</sup>                          |                             |

## References

- <sup>1</sup> Rieth, R. D.; Mankad, N. P.; Calimano, E.; Sadighi, J. P. Palladium-Catalyzed Cross-Coupling of Pyrrole Anions with Aryl Chlorides, Bromides, and Iodides. *Org. Lett.* **2004**, *6*, 3981-3983.
- <sup>2</sup> Peryshkov, D. V.; Schrock, R. R.; Takase, M. K.; Muller, P.; Hoveyda, A. H. Z-Selective Olefin Metathesis Reactions Promoted by Tungsten Oxo Alkylidene Complexes. *J. Am. Chem. Soc.* **2011**, *133*, 20754-20757.
- <sup>3</sup> Schrock, R. R.; Murdzek, J. S.; Bazan, G. C.; Robbins, J.; DiMare, M.; O'Regan, M. Synthesis of Molybdenum Imido Alkylidene Complexes and Some Reactions Involving Acyclic Olefins. *J. Am. Chem. Soc.* **1990**, *112*, 3875-3886.
- <sup>4</sup> SAINT, version 8.34A, Bruker (2012), Bruker AXS Inc., Madison, Wisconsin, USA.
- <sup>5</sup> SADABS, version 2012/1, Bruker (2012), Bruker AXS Inc., Madison, Wisconsin, USA.
- <sup>6</sup> Sheldrick, G. M., *Acta Cryst.* **2015**, *A71*, 3-8.
- <sup>7</sup> Sheldrick, G. M., *Acta Cryst.* **2015**, *C71*, 3-8.
- <sup>8</sup> Müller, P. *Crystallography Reviews* **2009**, *15*, 57-83.
